# Supplementary material for: Metabolomics Combined with Proteomics Provide a Novel Interpretation of the Changes in Flavonoid Glycosides during White Tea Processing
Source: MDPI journal article supplement (doi:10.3390/foods11091226), 2022-04-24
Supplement: s1 [file s1]

**Table S1.** The grouped list of metabolic and proteomic samples**Table S1-A.** Metabolic samples

| Withering time/h | Group of metabolomics sample | Three biological replicates |
|------------------|------------------------------|-----------------------------|
| 0                | MCK                          | MCK1                        |
|                  |                              | MCK2                        |
|                  |                              | MCK3                        |
| 12               | MWP                          | MWP1                        |
|                  |                              | MWP2                        |
|                  |                              | MWP3                        |
| 30               | MWF                          | MWF1                        |
|                  |                              | MWF2                        |
|                  |                              | MWF3                        |

**Table S1-B.** Proteomics samples

| Withering time/h | Group of proteomics sample | Three biological replicates |
|------------------|----------------------------|-----------------------------|
| 0                | PCK                        | PCK1                        |
|                  |                            | PCK2                        |
|                  |                            | PCK3                        |
| 12               | PWP                        | PWP1                        |
|                  |                            | PWP2                        |
|                  |                            | PWP3                        |
| 30               | PWF                        | PWF1                        |
|                  |                            | PWF2                        |
|                  |                            | PWF3                        |

**Table S2.** Numbers of differentially expressed proteins during the withering period

| Comparisons | Up  | Down | Down/Up | All |
|-------------|-----|------|---------|-----|
| PCK vs PWP  | 102 | 110  | 1.08    | 212 |
| PWP vs PWF  | 362 | 438  | 1.21    | 800 |
| PCK vs PWF  | 363 | 502  | 1.38    | 865 |

Comparisons: differential comparison groups; Up: up-regulation of differentially expressed proteins;  
 Down: down-regulation of differentially expressed proteins; All: all differentially expressed proteins.
