# Supplementary material for: Metabolomics Combined with Proteomics Provide a Novel Interpretation of the Changes in Flavonoid Glycosides during White Tea Processing
Source: MDPI journal article supplement (doi:10.3390/foods11091226), 2022-04-24
Supplement: s1 [file s1]

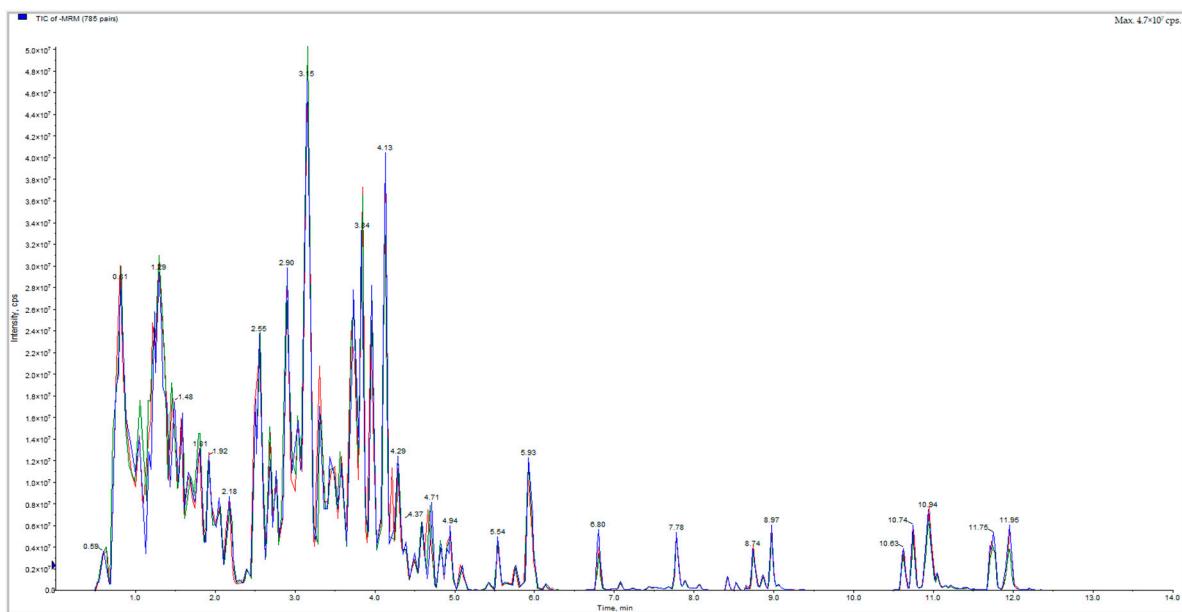

(A)

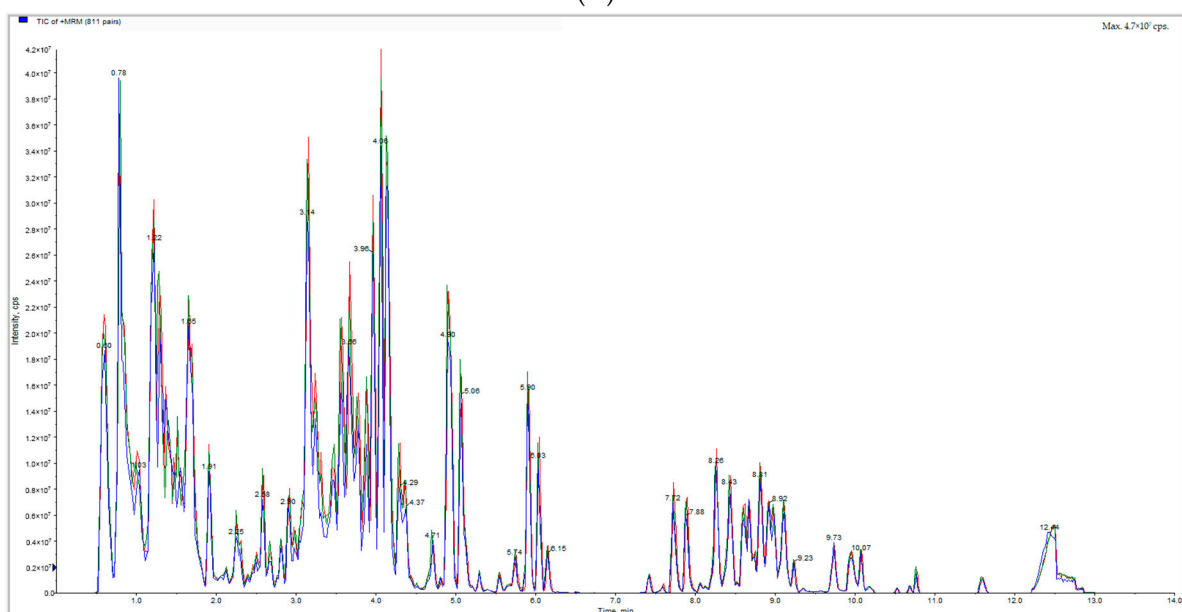

(B)

**Figure S1.** The quality control (QC) sample mass spectrometry detection TIC overlay. (A) QC MS tic overlap-N of the tea sample; (B) QC MS tic overlap-P of the tea sample.
