# Supplementary material for: Metabolomics Combined with Proteomics Provide a Novel Interpretation of the Changes in Flavonoid Glycosides during White Tea Processing
Source: Foods. 2022 Apr 24;11(9):1226. doi: 10.3390/foods11091226 (PMC9103810; doi:10.3390/foods11091226)
Supplement: Supplementary file 1 [file foods-11-01226-s001.zip]

Archive with 8 entries (8 files):
- Figure S1.pdf
- Figures S2-S5.pdf
- Table S1 and S2.pdf
- Table S3.xlsx
- Table S4.xlsx
- Table S5.xlsx
- Table S6.xlsx
- Table S7.xlsx
