# Supplementary material for: Metabolomics Combined with Proteomics Provide a Novel Interpretation of the Changes in Flavonoid Glycosides during White Tea Processing
Source: Foods. 2022 Apr 24;11(9):1226. doi: 10.3390/foods11091226 (PMC9103810; doi:10.3390/foods11091226)
Supplement: Supplementary file 1 [file foods-11-01226-s001.zip › Table S3.xlsx]

## Sheet: Sheet1
Table S3. The nonvolatile components identified and dynamic changes in contents (LC-MS intensity) during white tea processing. The values are presented as the mean ± SD from three biological replicates, and the different letters indicate significant differences at P < 0.05 according to Tukey's multiple comparison test.
Index	m/z	Main fragment	Molecular Weight (Da)	Formula	Ionization model	Compound identification	Class	CAS	Level	MCK	MWP	MWF
						Saccharides
mws1499	149.05	59.01	150.053	C5H10O5	[M-H]-	D-(-)-Arabinose	saccharide	10323-20-3	A	201203.33±22597.7b	292163.33±59436.89a	328830±35367.36a
pmf0139	179	59	180.063	C6H12O6	[M-H]-	D-(+)-Galactose*	saccharide	59-23-4	B	2140266.67±293868.16ab	1958266.67±310469.67b	2440966.67±176196.89a
pmf0138	179	59	180.063	C6H12O6	[M-H]-	D-(+)-Mannose*	saccharide	3458-28-4	B	1959900±88408.31ab	1801766.67±127919.82b	2614700±143512.65a
mws4170	179.06	59.01	180.063	C6H12O6	[M-H]-	D-Glucose*	saccharide	14431-43-7	A	2382966.67±102392.69ab	2195800±263711.34b	2866333.33±163906.45a
Hmcn000192	209.07	59.01	210.073	C7H14O7	[M-H]-	Sedoheptulose	saccharide	3019-74-7	A	1356233.33±224794.18b	1736866.67±319638.8ab	1873466.67±315958.33a
mws5040	365.11	203.05	341.108	C12H21O11Na	[M+H]+	Turanose	saccharide	547-25-1	B	1023713.33±101933.91a	504966.67±155107.49b	391500±89364.07b
mws0866	259	96.97	260.03	C6H13O9P	[M-H]-	D-Glucose 6-phosphate*	saccharide	56-73-5	A	3352300±87476.34a	1326300±11371.46b	406993.33±72396.2c
mws1090	259	97	260.03	C6H13O9P	[M-H]-	Glucose-1-phosphate*	saccharide	59-56-3	A	913486.67±224899.99a	410980±33370.27b	190810±40658.63b
mws0264	341	119.03	342.116	C12H22O11	[M-H]-	D-(+)-Trehalose*	saccharide	99-20-7	A	551960±19107.33a	450103.33±65869.09ab	343946.67±46310.9b
pme0519	341	119.03	342.116	C12H22O11	[M-H]-	D-(+)-Sucrose*	saccharide	57-50-1	A	1917333.33±411895.59a	1470093.33±625640.16ab	985213.33±215758.03b
mws5038	341.11	89.02	342.116	C12H22O11	[M-H]-	Isomaltulose*	saccharide	13718-94-0	A	1013110±379734.62a	941450±431898.1a	565423.33±100421.2b
mws2523	421.1	241.1	422.083	C12H23O14P	[M-H]-	Trehalose 6-phosphate	saccharide	4484-88-2	B	16294.67±1408.85ab	15366.13±1656.39b	19418.33±2942.41a
mws1589	503.2	179	504.169	C18H32O16	[M-H]-	Panose*	saccharide	33401-87-5	B	32176.33±9655.12b	89829.33±11913.34a	71513.67±19125.14a
						Flavonoid glycosides
pmp000116	433.1	415.1	432.106	C21H20O10	[M+H]+	Apigenin-8-C-glucoside	flavone glycoside	3681-93-4	A	4866266.67±779129.39ab	5989100±211854.12a	2924100±883156.49b
mws1073	595.2	457.2	594.159	C27H30O15	[M+H]+	Apigenin 6,8-C-diglucoside	flavone glycoside	23666-13-9	B	5462866.67±1354180.23ab	5460266.67±838134.24a	3842666.67±1075576.5b
Lmlp003531	449.11	287.06	448.101	C21H20O11	[M+H]+	Luteolin 3'-O-β-D-glucoside	flavone glycoside	5154-41-6	A	2437233.33±165268.22a	2210933.33±161734.61ab	1437633.33±248005.83b
pmn001405	447.1	447.1	448.101	C21H20O11	[M-H]-	Luteolin-7-O-glucoside	flavone glycoside	5373-11-5	A	1825233.33±260185.81a	1473300±114100ab	1235000±158763.6b
pmp000587	535.11	287.05	534.101	C24H22O14	[M+H]+	Luteolin-7-O-(6'-O-malonyl)-β-D-glucoside	flavone glycoside	-	A	26340.33±3522.94a	20328.33±3141.16ab	14055±4750.97b
pmp000593	595.16	287.05	594.159	C27H30O15	[M+H]+	Luteolin-7-O-rutinoside*	flavone glycoside	3563-98-2	B	3314666.67±183766.78a	2792433.33±219200.6ab	1994233.33±186266.49b
Zmhp002574	611.16	431.1	610.153	C27H30O16	[M+H]+	Iso-8-C-hexosyl-luteolin O-hexoside	flavone glycoside	-	B	688090±105107.32a	675363.33±103360.3ab	219193.33±94561.75b
pmb0624	611.1	431.3	610.153	C27H30O16	[M+H]+	6-C-Hexosyl-luteolin O-hexoside	flavone glycoside	-	B	275576.67±47502.49a	252400±7689.39ab	117780.33±22278.95b
pmb0660	757.2	147.1	756.19	C36H36O18	[M+H]+	C-Hexosyl-luteolin O-p-coumaroylhexoside	flavone glycoside	-	B	567346.67±26341.11a	513723.33±66010.5ab	387880±16433.76b
pmp000579	463.12	301.07	462.116	C22H22O11	[M+H]+	Diosmetin-7-O-galactoside	flavone glycoside	-	B	2890200±221158.29a	2972900±831888.2a	1031946.67±391427.92b
Lmlp002990	595.17	313.07	594.158	C27H30O15	[M+H]+	Isosaponarin（Isovitexin-4'-O-glucoside）	flavone glycoside	19416-87-6	A	16735800±2077933.33a	17105933.33±3616481.39a	6840666.67±1660101.51b
pme3227	579	433	578.164	C27H30O14	[M+H]+	Vitexin 2''-O-β-L-rhamnoside	flavone glycoside	64820-99-1	A	26746333.33±2769266.03b	29984000±3887013.89a	15560333.33±3846564.48c
mws0919	431	285	432.106	C21H20O10	[M-H]-	Kaempferin	flavonol glycoside	482-39-3	A	63548.33±1897.04ab	73237.33±4732a	47498±4235.06b
mws2209	447.1	287.06	448.101	C21H20O11	[M-H]-	Astragalin*	flavonol glycoside	480-10-4	A	10463666.67±242801.02ab	11560833.33±239628.92a	9872566.67±129344.79b
pmn001637	417.1	285	418.09	C20H18O10	[M-H]-	Juglanin*	flavonol glycoside	5041-67-8	A	300356.67±19209.08ab	358673.33±21230.87a	269393.33±3798.87b
mws0913	447	285.04	448.101	C21H20O11	[M-H]-	Trifolin	flavonol glycoside	23627-87-4	A	5448400±549158.48a	4898033.33±578707.23ab	4090200±488347b
mws1290	593.14	285	594.137	C30H26O13	[M-H]-	Tiliroside	flavonol glycoside	20316-62-5	A	18791666.67±398483.79a	17213666.67±858528ab	14533333.33±1021709.52b
Hmln002402	533.1	489.11	534.101	C24H22O14	[M-H]-	Kaempferol 3-O-(6′′-O-malonyl)-galactoside*	flavonol glycoside	-	A	2874633.33±45853.28a	2637200±76772.33ab	1757800±123093.74b
Lmyp004318	595.14	287.06	594.137	C30H26O13	[M+H]+	Kaempferol 3-O-(6''-trans-p-Coumaroyl)-β-D-Glucoside*	flavonol glycoside	-	A	9750633.33±1848086.15b	12708000±1027887.64a	10575000±127184.9ab
Lmbp003668	419.1	287.05	418.09	C20H18O10	[M+H]+	Kaempferol-3-arabinopyranoside	flavonol glycoside	-	A	9336866.67±2322088.77b	13686333.33±1108675.04a	10454633.33±1426692.68b
Zmhn003565	489.1	285.04	490.111	C23H22O12	[M-H]-	Kaempferol 3-O-(6''-O-acetyl) glycoside	flavonol glycoside	-	A	2446900±42188.98b	3366800±427089.08a	2048533.33±258939.03b
Hmln002483	533.1	489.11	534.101	C24H22O14	[M-H]-	Kaempferol 3-O-(6′′-O-malonyl)-glucoside*	flavonol glycoside	-	A	3562633.33±193354.35a	2913000±183172.13a	2043600±136521.54b
Lmbp003230	595.16	287.05	594.158	C27H30O15	[M+H]+	Kaempferol-3-O-neohesperidoside*	flavonol glycoside	32602-81-6	A	3245066.67±251892.25ab	3551266.67±185656.41a	2961533.33±207978.49b
pme0369	593.16	285	594.159	C27H30O15	[M-H]-	Kaempferol 3-O-rutinoside(Nicotiflorin)*	flavonol glycoside	17650-84-9	A	28190666.67±1594246.01a	27129666.67±1889390.47a	19333000±3315030.01b
pme0321	431.11	285	432.106	C21H20O10	[M-H]-	Kaempferol 7-O-rhamnoside	flavonol glycoside	20196-89-8	A	85919.67±1661.85a	76628±12199.69ab	51423±3157.01b
mws0089	447.09	285.04	448.101	C21H20O11	[M-H]-	Kaempferol 7-O-glucoside*	flavonol glycoside	16290-07-6	A	12766333.33±91248.74a	11573333.33±1233434.77ab	9860133.33±1066227.3b
pmp001310	627.2	303.1	626.148	C27H30O17	[M+H]+	6-Hydroxykaempferol-3,6-O-Diglucoside	flavonol glycoside	-	B	2962500±580757.47a	2475666.67±222073.96ab	1472033.33±286306.73b
pmp001309	465.1	303.1	464.096	C21H20O12	[M+H]+	6-Hydroxykaempferol-7-O-glucoside	flavonol glycoside	-	A	718936.67±121960.3ab	1039400±129788.99a	496843.33±152637.34b
Lmyp003348	601.12	287.06	600.112	C28H24O15	[M+H]+	Kaempferol-galolylglucoside	flavonol glycoside	-	A	5168533.33±2003488.69b	9581333.33±1777788a	6262200±399971.01b
mws2186	435.08	303	434.085	C20H18O11	[M+H]+	Avicularin*	flavonol glycoside	572-30-5	B	8020200±714512.45a	7154600±223192.02ab	5576100±1904053.83b
mws0059	609.1	301.04	610.153	C27H30O16	[M-H]-	Rutin	flavonol glycoside	153-18-4	A	525400±51271.14b	727703.33±101137.88a	509270±128953.65b
mws0856	463	301	464.096	C21H20O12	[M-H]-	Spiraeoside*	flavonol glycoside	20229-56-5	A	21826000±3778097.27a	15956333.33±935448.73b	13808133.33±3643589.89c
mws1329	463.09	301.04	464.096	C21H20O12	[M-H]-	Gossypitrin	flavonol glycoside	491-50-9	A	849176.67±36579.46a	843253.33±118938.32a	536156.67±126033.21b
Hmln002199	505.1	300.03	506.107	C23H22O13	[M-H]-	Quercetin 3-O-(6''-O-acetyl)-galactoside	flavonol glycoside	-	A	435323.33±123721.89a	437403.33±70104.07a	245280±11493.23b
Hmln002189	549.09	505.11	550.096	C24H22O15	[M-H]-	Quercetinn 3-O-(6''-O-malonyl)-galactoside*	flavonol glycoside	-	A	2384500±170903.69a	2028600±176313.44a	999876.67±179752.03b
Lmyp003139	617.11	153.02	616.106	C28H24O16	[M+H]+	Quercetin 3-O-(2″-galloyl)-β-D-glucopyranoside	flavonol glycoside	69624-79-9	B	2339200±75979.01b	3213500±572896.67a	2349500±233416.77b
pmn001583	609.1	300.03	610.153	C27H30O16	[M-H]-	Quercetin 3-O-robinobioside	flavonol glycoside	52525-35-6	A	749696.67±120272.88a	606753.33±139532.33a	436296.67±123477.4b
Lmdp003509	435.09	303.06	434.084	C20H18O11	[M+H]+	Quercetin 3-O-β-D-xylopyranoside	flavonol glycoside	549-32-6	B	9726766.67±1549798.14a	8996300±987437.51a	6371633.33±1601193.79b
pmp000589	551.1	303.05	550.096	C24H22O15	[M+H]+	Quercetin-7-O-(6'-O-malonyl)-β-D-glucoside*	flavonol glycoside	-	A	3324700±283673.17a	2926300±269142.1ab	1319966.67±267931.23b
pmp000580	465.1	303.05	464.096	C21H20O12	[M+H]+	Isoquercitrin(Quercetin 3-O-β-D-glucoside)*	flavonol glycoside	482-35-9	A	1645333.33±149650.8a	1453900±132194.97ab	1080296.67±205580.65b
pmp000413	433.11	283.06	432.106	C21H20O10	[M+H]+	Genistein 8-C-glucoside	isoflavone glycoside	66026-80-0	A	5708966.67±1152964.46b	8633800±1809986.7a	5289733.33±1528060.66b
Lmdp003577	433.11	271.06	432.106	C21H20O10	[M+H]+	Genistin (Genistein 7-O-Glucoside)	isoflavone glycoside	-	B	3917266.67±664597.1a	3241733.33±281853.37a	2093700±177175.87b
mws1179	433	271	434.121	C21H22O10	[M-H]-	Naringenin-7-O-glucoside	dihydroflavone glycoside	529-55-5	B	4570066.67±143273.04a	3014633.33±103886.11ab	2530400±221014.39b
mws1361	449.1	303.05	450.116	C21H22O11	[M-H]-	Astilbin	dihydroflavonol glycoside	29838-67-3	B	90395±5185.93a	78120.67±6679.04b	82202.33±7528.35ab
Cmcp002131	867.21	599	598.55	C27H34O15	[M+H]+	Phloretin-3,5-di-C-glucoside	dihydrochalcone glycoside	357401-40-2	B	2267433.33±177994.39a	1934800±261087.02a	1198153.33±238835.57b
mws2118	435.13	166.7	436.137	C21H24O10	[M-H]-	Phloretin 2'-O-glucoside	dihydrochalcone glycoside	60-81-1	A	374686.67±21477.71a	384263.33±53436.99a	255860±63235.11b
						Flavonoid aglycones
pmp000571	271.06	153.01	270.053	C15H10O5	[M+H]+	Apigenin	flavone	520-36-5	B	6886.07±249.67b	9483.3±367.98a	11142.67±848.79a
pme0088	285	151	286.048	C15H10O6	[M-H]-	Luteolin	flavone	491-70-3	A	65257.33±3712.61b	73809.33±7726.82ab	127036.33±6503.62a
mws0058	299.06	284	300.063	C16H12O6	[M-H]-	Diosmetin	flavone	520-34-3	B	66804.67±13681.87b	101613±22506.12ab	148790.33±12596.25a
mws0920	301	151	302.043	C15H10O7	[M-H]-	Tricetin	flavone	520-31-0	A	1589666.67±187850.37a	1606233.33±129557.1a	841443.33±99364.39b
Lmzp004885	331.08	315.05	330.074	C17H14O7	[M+H]+	Tricin*	flavone	520-32-1	A	136266.67±7437.59b	393760±41138.95ab	674033.33±133288.73a
pmp000008	359.11	344.08	358.105	C19H18O7	[M+H]+	5-Hydroxy-6,7,3',4'-tetramethoxyflavone	flavone	21763-80-4	B	1880700±570676.76b	5251433.33±515987.89a	4585066.67±220204.14a
pme0376	271.07	151	272.069	C15H12O5	[M-H]-	Naringenin*	dihydroflavone	480-41-1	A	315400±18251.05a	289666.67±24616.2a	185686.67±10761.42b
pme3475	273.07	153	272.069	C15H12O5	[M+H]+	Butin*	dihydroflavone	492-14-8	A	579366.67±33412.06a	540143.33±51028.05ab	351276.67±18626.24b
mws0064	287.06	135	288.063	C15H12O6	[M-H]-	Eriodictyol	dihydroflavone	552-58-9	A	282363.33±16555.23b	282510±16731.51b	591200±166889.24a
pme2954	303.04	137.02	302.043	C15H10O7	[M+H]+	Quercetin*	flavonol	117-39-5	B	180956.67±21336.41b	228650±36912.86ab	328763.33±51085.85a
mws1068	285.05	151	286.048	C15H10O6	[M-H]-	Kaempferol	flavonol	520-18-3	A	44540.67±11737.16b	230916.67±54736.85a	277210±19767.98a
mws0914	271	151	272.069	C15H12O5	[M-H]-	Pinobanksin*	dihydroflavonol	548-82-3	B	258636.67±16712.9a	239530±29217.42a	153693.33±12737.71b
mws1094	287.06	259	288.063	C15H12O6	[M-H]-	Dihydrokaempferol	dihydroflavonol	480-20-6	A	104740.67±18731.84c	200320±36115.09b	622806.67±183041.87a
mws0044	303.06	125.02	304.058	C15H12O7	[M-H]-	Taxifolin	dihydroflavonol	480-18-2	A	508556.67±75087.77a	203630±5243.08b	169243.33±17578.03b
mws0744	319.05	301	320.053	C15H12O8	[M-H]-	Dihydromyricetin(Ampelopsin)	dihydroflavonol	27200-12-0	A	1346300±226152.01a	911143.33±186053.6ab	601356.67±10103.27b
mws1140	271.07	151	272.069	C15H12O5	[M-H]-	Naringenin chalcone(4,2',4',6'-Tetrahydroxychalcone)	chalcone	73692-50-9	A	699073.33±41150.88b	679996.67±73181.67b	1536233.33±117445.15a
Note: * the isomeric labeling indicates that these compounds are very similar in structure and co-flux will occur in mass spectrometry, which can be used for preliminary identification, but cannot be clearly distinguished.
