# Supplementary material for: Metabolomics Combined with Proteomics Provide a Novel Interpretation of the Changes in Flavonoid Glycosides during White Tea Processing
Source: Foods. 2022 Apr 24;11(9):1226. doi: 10.3390/foods11091226 (PMC9103810; doi:10.3390/foods11091226)
Supplement: Supplementary file 1 [file foods-11-01226-s001.zip › Table S4.xlsx]

## Sheet: Sheet1
Table S4. Significantly enriched gene ontology (GO) terms during the withering process
GO_ID	Term	Category	P value	Rich factor
GO:0022624	Proteasome accessory complex	Cellular Component	0.00131243	0.916667
GO:0017025	TBP-class protein binding	Molecular Function	0.00196259	1
GO:1903507	Negative regulation of nucleic acid-templated transcription	Biological Process	0.00424033	0.8125
GO:1902679	Negative regulation of RNA biosynthetic process	Biological Process	0.00424033	0.8125
GO:0045892	Negative regulation of transcription, DNA-templated	Biological Process	0.00763526	0.8
GO:0051253	Negative regulation of RNA metabolic process	Biological Process	0.00796856	0.75
GO:0005838	Proteasome regulatory particle	Cellular Component	0.010472	0.888889
GO:0045934	Negative regulation of nucleobase-containing compound metabolic process	Biological Process	0.0161328	0.714286
GO:0060261	Positive regulation of transcription initiation from RNA polymerase II promoter	Biological Process	0.0203804	1
GO:0060260	Regulation of transcription initiation from RNA polymerase II promoter	Biological Process	0.0203804	1
GO:0036402	Proteasome-activating ATPase activity	Molecular Function	0.0203804	1
GO:0070897	DNA-templated transcriptional preinitiation complex assembly	Biological Process	0.0203804	1
GO:0005832	Chaperonin-containing T-complex	Cellular Component	0.0203804	1
GO:0101031	Chaperone complex	Cellular Component	0.0203804	1
GO:0031595	Nuclear proteasome complex	Cellular Component	0.0203804	1
GO:2000142	Regulation of DNA-templated transcription initiation	Biological Process	0.0203804	1
GO:2000144	Positive regulation of DNA-templated transcription initiation	Biological Process	0.0203804	1
GO:0006342	Chromatin silencing	Biological Process	0.0203804	1
GO:0008540	Proteasome regulatory particle, base subcomplex	Cellular Component	0.0203804	1
GO:0008134	Transcription factor binding	Molecular Function	0.0294152	0.681818
