# Supplementary material for: Metabolomics Combined with Proteomics Provide a Novel Interpretation of the Changes in Flavonoid Glycosides during White Tea Processing
Source: Foods. 2022 Apr 24;11(9):1226. doi: 10.3390/foods11091226 (PMC9103810; doi:10.3390/foods11091226)
Supplement: Supplementary file 1 [file foods-11-01226-s001.zip › Table S5.xlsx]

## Sheet: Sheet1
Table S5. Significantly enriched KEGG pathways during the withering process
Table S5-A. PCK vs PWP
Map_ID	Map_Name	P value	Enrich factor	FDR (BH method)
ko00941	Flavonoid biosynthesis	6.25017e-05	7.03788	0.00229173
ko00520	Amino sugar and nucleotide sugar metabolism	0.00013697	5.29866	0.00376668
ko00940	Phenylpropanoid biosynthesis	0.00440417	3.097	0.0538287
ko03036	Chromosome and associated proteins	0.0107428	1.92496	0.118171
ko04016	MAPK signaling pathway - plant	0.0223612	2.74922	0.204978
ko04147	Exosome	0.0377354	1.77463	0.259431
Table S5-B. PWP vs PWF
Map_ID	Map_Name	P value	Enrich factor	FDR (BH method)
ko04147	Exosome	4.02831e-08	2.12554	1.87316e-06
ko03051	Proteasome	4.81482e-07	3.87059	1.79111e-05
ko00410	beta-Alanine metabolism	7.94265e-07	5.85322	2.46222e-05
ko00071	Fatty acid degradation	1.77622e-06	5.00234	4.71966e-05
ko03050	Proteasome (03050)	3.0069e-06	4.44809	6.99104e-05
ko00561	Glycerolipid metabolism	7.22214e-05	3.81265	0.00134332
ko00480	Glutathione metabolism	0.000161359	2.98548	0.00250106
ko04144	Endocytosis	0.000173874	2.49148	0.00248774
ko00053	Ascorbate and aldarate metabolism	0.000188473	3.69852	0.002504
ko00620	Pyruvate metabolism	0.000208726	2.79851	0.00228371
ko03030	DNA replication	0.000243226	4.26965	0.00251333
ko00010	Glycolysis / Gluconeogenesis	0.000309463	2.70295	0.00302948
ko00030	Pentose phosphate pathway	0.000697708	3.71053	0.00648869
ko03110	Chaperones and folding catalysts	0.000779149	2.00879	0.00690104
ko00280	Valine, leucine and isoleucine degradation	0.00106148	3.50207	0.00897429
ko00520	Amino sugar and nucleotide sugar metabolism	0.00123547	2.46196	0.00999118
ko00590	Arachidonic acid metabolism	0.00131471	5.97096	0.010189
ko00940	Phenylpropanoid biosynthesis	0.00193406	2.01458	0.0143894
ko03018	RNA degradation	0.00245104	2.47368	0.0175344
ko01002	Peptidases and inhibitors	0.0029952	1.73158	0.0198967
Table S5-C. PCK vs PWF
Map_ID	Map_Name	P value	Enrich factor	FDR (BH method)
ko04147	Exosome	2.78558e-06	1.45279	0.000128137
ko03030	DNA replication	6.96282e-05	1.89366	0.00256232
ko00071	Fatty acid degradation	8.86584e-05	2.75076	0.00271886
ko00561	Glycerolipid metabolism	0.000119643	1.91083	0.00314491
ko00620	Pyruvate metabolism	0.000121007	4.49748	0.00278316
ko00940	Phenylpropanoid biosynthesis	0.000121356	4.01275	0.00248105
ko04144	Endocytosis	0.000348699	3.61449	0.00583279
ko00630	Glyoxylate and dicarboxylate metabolism	0.000639314	2.81887	0.00980282
ko03051	Proteasome (03051)	0.000715339	2.27366	0.0101248
ko00053	Ascorbate and aldarate metabolism	0.00117478	1.83531	0.0154399
ko00010	Glycolysis / Gluconeogenesis	0.00156769	2.36199	0.0192304
ko00480	Glutathione metabolism	0.00262287	2.8645	0.0254004
ko00941	Flavonoid biosynthesis	0.00352049	2.70378	0.0323885
ko00460	Cyanoamino acid metabolism	0.00464482	3.18753	0.0406975
ko00410	beta-Alanine metabolism	0.00576934	2.40231	0.0461547
ko03050	Proteasome (03050)	0.00605875	1.67093	0.0464504
ko00520	Amino sugar and nucleotide sugar metabolism	0.0127715	1.72231	0.081033
ko00945	Stilbenoid, diarylheptanoid and gingerol biosynthesis	0.013345	1.72231	0.0818496
ko03420	Nucleotide excision repair	0.0167904	2.45294	0.0936192
ko00052	Galactose metabolism	0.0209941	2.59818	0.113615
Table S5-D. MEturquoise module
Map_ID	Map_Name	P value	enrichFactor	FDR (BH method)
ko00620	Pyruvate metabolism	8.62e-10	3.85702	5.32e-08
ko00071	Fatty acid degradation	3.57e-09	5.45492	1.65e-07
ko04147	Exosome	5.57e-09	2.0492	1.72e-07
ko00010	Glycolysis / Gluconeogenesis	8.36e-09	3.59227	1.93e-07
ko03110	Chaperones and folding catalysts	1.98e-07	2.468	4.06e-06
ko03051	Proteasome	1.12e-06	3.36922	1.72e-05
ko00280	Valine, leucine and isoleucine degradation	4.1e-06	4.29039	5.06e-05
ko04141	Protein processing in endoplasmic reticulum	1.09e-05	2.41885	0.000126
ko03030	DNA replication	1.25e-05	4.4835	0.000136
ko00630	Glyoxylate and dicarboxylate metabolism	3.32e-05	3.11187	0.000341
ko00410	beta-Alanine metabolism	5.08e-05	4.22564	0.000495
ko00053	Ascorbate and aldarate metabolism	9.83e-05	3.44243	0.000866
ko00903	Limonene and pinene degradation	0.000144	9.09154	0.00121106
ko03050	Proteasome	0.000176	3.25294	0.00141312
ko04144	Endocytosis	0.000245	2.25653	0.00188777
ko00592	alpha-Linolenic acid metabolism	0.000421	3.14707	0.00311264
ko00380	Tryptophan metabolism	0.000579	2.88268	0.00411961
ko00561	Glycerolipid metabolism	0.000646	3.00271	0.00442779
ko01040	Biosynthesis of unsaturated fatty acids	0.000758	4.54577	0.00501118
ko04146	Peroxisome	0.00081	2.55699	0.00516749
