# Supplementary material for: Metabolomics Combined with Proteomics Provide a Novel Interpretation of the Changes in Flavonoid Glycosides during White Tea Processing
Source: Foods. 2022 Apr 24;11(9):1226. doi: 10.3390/foods11091226 (PMC9103810; doi:10.3390/foods11091226)
Supplement: Supplementary file 1 [file foods-11-01226-s001.zip › Table S6.xlsx]

## Sheet: Sheet1
Table S6. Part of differentially expressed proteins and their expression abundance during the withering period
Table S6-A. Flavonoids and flavonoid glycoside biosynthesis
Map_ID	Protein_ID	Definition	Relative expression			ANOVA p value	Tukey's multiple comparisons test
			PCK	PWP	PWF
Phenylpropanoid biosynthesis [map00940]	K10775	phenylalanine ammonia-lyase [EC:4.3.1.24]
	TEA003374	phenylalanine ammonia-lyase G4-like [XP_028111048.1]	1.03±0.07	0.98±0.08	1.01±0.05	0.678639	NA
	TEA023243	phenylalanine ammonia-lyase-like [XP_028103618.1]	1.42±0.17a	0.85±0.04	0.79±0.07	0.000767159	PWF-PCK;PWP-PCK
	TEA034008	phenylalanine ammonia-lyase [XP_028066321.1]	1.17±0.21	0.88±0.01	0.98±0.12	0.112714	NA
	TEA024587	phenylalanine ammonia-lyase-like [XP_028109357.1]	1.25±0.13	0.88±0.06	0.89±0.02	0.00227276	PWF-PCK;PWP-PCK
Phenylpropanoid biosynthesis [map00940]	K01904	4-coumarate--CoA ligase [EC:6.2.1.12]
	TEA027829	4-coumarate--CoA ligase 2-like [XP_028070995.1]	0.99±0.11	1.03±0.07	1±0.08	0.858483	NA
	TEA034012	4-coumarate--CoA ligase 2 [XP_028052520.1]	1.07±0.09	0.91±0.04	1.03±0.08	0.0979519	NA
Phenylpropanoid biosynthesis [map00940]	K00487	trans-cinnamate 4-monooxygenase [EC:1.14.14.91]
	TEA034001	trans-cinnamate 4-monooxygenase-like [XP_028056645.1]	1.02±0.06	1.04±0.03	0.97±0.01	0.233641	NA
	TEA014864	Trans-cinnamate 4-monooxygenase [PSS14168.1]	1.04±0.03	0.9±0.01	1.04±0.03	0.00066865	PWP-PCK;PWP-PWF
Flavonoid biosynthesis [map00941]	K00660	chalcone synthase [EC:2.3.1.74]
	TEA034042	chalcone synthase 2 [XP_028080516.1]	1.15±0.16	0.81±0.09	1.07±0.02	0.0198364	PWP-PCK
	TEA023333	chalcone synthase 3 [XP_028067485.1]	1.08±0.12	0.83±0.07	1.08±0.05	0.0139237	PWP-PCK;PWP-PWF
	TEA023340	chalcone synthase 1 [XP_028067484.1]	1.12±0.12	0.89±0.03	1.02±0	0.0217666	PWP-PCK
Flavonoid biosynthesis [map00941]	K01859	chalcone isomerase [EC:5.5.1.6]
	TEA034003	chalcone isomerase [ASU87417.1]	1.1±0.1	1.02±0.02	0.92±0.05	0.0445026	PWF-PCK
	TEA033023	chalcone--flavonone isomerase-like isoform X1 [XP_028119616.1]	1.09±0.14	1.03±0.06	0.93±0.04	0.153986	NA
	TEA013101	chalcone--flavonone isomerase [XP_028092220.1]	1.08±0.11	1.04±0.06	0.92±0.08	0.146117	NA
Flavonoid biosynthesis [map00941]	K00475	naringenin 3-dioxygenase [EC:1.14.11.9]
	TEA023790	naringenin,2-oxoglutarate 3-dioxygenase [XP_028107405.1]	1.11±0.1	0.89±0.07	1.04±0.02	0.0290607	PWP-PCK
Flavonoid biosynthesis [map00941]	K05278	flavonol synthase [EC:1.14.20.6]
	TEA010328	flavonol synthase/flavanone 3-hydroxylase-like isoform X2 [XP_028053061.1]	1.1±0.12	0.9±0.01	1.03±0.02	0.0427098	PWP-PCK
	TEA006643	flavonol synthase/flavanone 3-hydroxylase-like [XP_028116517.1]	1.44±0.31	0.88±0.04	0.76±0.01	0.00762151	PWF-PCK;PWP-PCK
Flavone and flavonol biosynthesis [map00944]	K13269	kaempferol 3-O-beta-D-galactosyltransferase [EC:2.4.1.234]
	TEA001623	kaempferol 3-O-beta-D-galactosyltransferase-like [XP_028088706.1]	0.96±0.02	0.95±0.05	1.08±0.02	0.00455257	PWF-PCK;PWP-PWF
Flavonoid biosynthesis [map00941]	K05280	flavonoid 3'-monooxygenase [EC:1.14.14.82]
	TEA006847	flavonoid 3'-monooxygenase [XP_028112285.1]	0.99±0.04	0.9±0.01	1.13±0.06	0.00190106	PWF-PCK;PWP-PWF
Flavone and flavonol biosynthesis [map00944]	K05279	flavonol 3-O-methyltransferase [EC:2.1.1.76]
	TEA018963	isoliquiritigenin 2'-O-methyltransferase-like isoform X2 [XP_023919597.1]	0.98±0.06	0.9±0.11	1.14±0.09	0.0441086	PWP-PWF
Table S6-B. Flavonol glycoside degradation and antioxidant enzymes
	Protein_ID	Definition	Relative expression			ANOVA p value	Tukey's multiple comparisons test
			PCK	PWP	PWF
	Glycosidase
	TEA002469	beta-glucosidase 12-like [XP_028051936.1]	0.91±0.05	0.98±0.08	1.08±0.04	0.0313	PCK-PWF
	Primeverosidase
	TEA005964	Beta-primeverosidase [AYQ58375.1]	1.28±0.14	1.06±0.09	0.75±0.05	0.00213866	PWF-PCK;PWP-PWF
	Polyphenoloxidase
	TEA005488	polyphenol oxidase, chloroplastic-like [XP_028126923.1 ]	0.92±0.08	1.02±0.06	1.08±0.05	0.0488821	PWF-PCK
	Glutathione reductase
	TEA000904	glutathione reductase, chloroplastic-like [XP_028108574.1]	0.88±0.03	0.91±0.06	1.19±0.04	0.000440555	PWF-PCK;PWP-PWF
	TEA005612	glutathione reductase, chloroplastic [XP_028125899.1]	0.94±0.05	1.02±0.03	1.03±0.03	0.0404475	PWF-PCK
	TEA018816	glutathione reductase, chloroplastic-like isoform X1 [XP_028096150.1]	1±0.08	0.93±0.06	1.07±0.05	0.0958932	NA
	Catalase
	TEA006171	catalase isozyme 1-like isoform X1 [XP_028076166.1]	0.82±0.1	0.9±0.08	1.26±0.05	0.00102685	PWF-PCK;PWP-PWF
	TEA021409	catalase-like [XP_028082957.1]	0.94±0.07	0.97±0.02	1.09±0.05	0.0192526	PWF-PCK
	TEA002986	catalase isozyme 1 [XP_028098144.1]	0.94±0.03	0.98±0.03	1.09±0.04	0.00298624	PWF-PCK;PWP-PWF
	Ascorbate peroxidase
	TEA000543	L-ascorbate peroxidase 3-like [XP_028113335.1]	0.93±0.02	0.95±0.04	1.11±0.02	0.000296544	PWF-PCK;PWP-PWF
	TEA019211	L-ascorbate peroxidase 3-like [XP_028077789.1]	0.93±0.02	0.96±0.04	1.1±0.07	0.00806881	PWF-PCK;PWP-PWF
	TEA026035	L-ascorbate peroxidase, cytosolic [XP_028098421.1]	0.96±0.01	0.94±0.01	1.07±0.01	3.16386e-05	PWF-PCK;PWP-PWF
	TEA011393	peroxidase P7-like isoform X1 [XP_028119942.1]	0.82±0.07	1.04±0.05	1.15±0.27	0.114315	NA
	Peroxidase
	TEA027359	peroxidase 4-like [XP_028120711.1]	0.94±0.02	1.01±0.02	1.07±0.01	0.000384008	PWF-PCK;PWP-PCK;PWP-PWF
	TEA026798	cationic peroxidase 1-like [XP_028120871.1]	0.82±0.14	1.12±0.13	1.05±0.1	0.0501398	NA
Table S6-C. The identified key hub proteins of co-expression network for the MEturquoise module
	Proteins ID	Definition	Relative expression			ANOVA p value	Tukey's multiple comparisons test
			PCK	PWP	PWF
	TEA012075	Transcription factor HY5 [XP_028120847.1]	0.81±0.1	0.78±0.07	1.32±0.18	0.00358109	PWF-PCK;PWP-PWF
	TEA032700	Cytosolic endo-beta-N-acetylglucosaminidase 1-like isoform X1 [XP_028059627.1]	0.86±0.1	0.81±0.05	1.27±0.16	0.00413778	PWF-PCK;PWP-PWF
	TEA033504	Aconitate hydratase, cytoplasmic isoform X1 [XP_028060288.1]	0.92±0.09	0.85±0.05	1.17±0.14	0.0200564	PWP-PWF
	TEA014859	26S proteasome regulatory subunit 7 [XP_028088381.1]	0.88±0.05	0.86±0.05	1.21±0.11	0.00189541	PWF-PCK;PWP-PWF
	TEA023680	Glutathione synthetase, chloroplastic-like isoform X2 [XP_028081452.1]	0.88±0.09	0.82±0.06	1.25±0.13	0.00355996	PWF-PCK;PWP-PWF
	TEA015233	Transcription factor TCP13-like [XP_028108887.1]	0.79±0.13	0.72±0.14	1.4±0.22	0.00476631	PWF-PCK;PWP-PWF
	TEA023090	Alanine aminotransferase 2-like isoform X2 [XP_028123570.1]	0.9±0.05	0.89±0.04	1.15±0.08	0.00349648	PWF-PCK;PWP-PWF
	TEA030009	Anthocyanidin reductase ((2S)-flavan-3-ol-forming)-like [XP_028054464.1]	0.94±0.03	0.92±0.04	1.11±0.04	0.00176243	PWF-PCK;PWP-PWF
