# Supplementary material for: Metabolomics Combined with Proteomics Provide a Novel Interpretation of the Changes in Flavonoid Glycosides during White Tea Processing
Source: Foods. 2022 Apr 24;11(9):1226. doi: 10.3390/foods11091226 (PMC9103810; doi:10.3390/foods11091226)
Supplement: Supplementary file 1 [file foods-11-01226-s001.zip › Table S7.xlsx]

## Sheet: Sheet1
Table S7. All proteins KME
Proteins ID	KME	Colors
TEA003507	-0.836578	cyan
TEA004749	0.92558	cyan
TEA019450	-0.827606	cyan
TEA020528	-0.884356	cyan
TEA029443	-0.914684	cyan
TEA004690	0.949121	cyan
TEA005199	0.826019	cyan
TEA001329	-0.864541	cyan
TEA022793	0.728782	cyan
TEA018766	0.892882	cyan
TEA006411	-0.903525	cyan
TEA028773	0.952982	cyan
TEA002073	0.601914	cyan
TEA029587	0.936209	cyan
TEA010207	0.943326	cyan
TEA029738	0.814449	cyan
TEA029269	-0.89075	cyan
TEA007135	0.695498	cyan
TEA026643	-0.923709	cyan
TEA008018	0.848145	cyan
TEA025143	0.911188	cyan
TEA005754	0.845803	cyan
TEA024884	0.86984	cyan
TEA008882	-0.932113	cyan
TEA011952	0.759348	cyan
TEA026955	-0.862587	cyan
TEA009399	0.949472	cyan
TEA003341	-0.719666	cyan
TEA028377	0.906513	cyan
TEA027345	0.928094	cyan
TEA031327	-0.757186	cyan
TEA001603	-0.792952	cyan
TEA006854	0.854324	cyan
TEA000640	0.947272	cyan
TEA018952	0.675737	cyan
TEA009670	0.964758	cyan
TEA031194	-0.784019	cyan
TEA017168	-0.969838	cyan
TEA017101	0.957733	cyan
TEA008539	0.907982	cyan
TEA008864	-0.695463	salmon
TEA028845	-0.897053	salmon
TEA010066	-0.806831	salmon
TEA025656	-0.965849	salmon
TEA003776	-0.976534	salmon
TEA030620	0.873111	salmon
TEA028163	-0.917975	salmon
TEA015924	-0.728186	salmon
TEA011607	-0.924572	salmon
TEA028308	-0.957997	salmon
TEA015862	0.866068	salmon
TEA019294	-0.783484	salmon
TEA011900	0.885666	salmon
TEA004711	-0.911796	salmon
TEA008093	-0.9171	salmon
TEA012252	0.86709	salmon
TEA003712	-0.85724	salmon
TEA031417	-0.494421	salmon
TEA000061	0.901803	salmon
TEA014869	-0.959713	salmon
TEA029034	0.919397	salmon
TEA030899	0.812314	salmon
TEA007818	-0.92065	salmon
TEA010862	0.891502	salmon
TEA014656	-0.931703	salmon
TEA023961	0.905257	salmon
TEA000392	-0.752717	salmon
TEA009581	-0.894203	salmon
TEA020988	0.944555	salmon
TEA007085	0.807972	salmon
TEA031942	-0.950833	salmon
TEA008122	-0.954977	salmon
TEA021260	-0.947141	salmon
TEA005207	0.908457	salmon
TEA005831	0.882324	salmon
TEA001184	0.982624	salmon
TEA013020	0.911415	salmon
TEA020890	0.924289	salmon
TEA008509	0.838477	salmon
TEA007983	0.97302	salmon
TEA015492	0.602545	salmon
TEA008810	0.862036	salmon
TEA005111	0.842591	salmon
TEA032566	0.782835	salmon
TEA030217	0.942348	salmon
TEA020353	-0.881896	salmon
TEA011587	-0.919821	salmon
TEA003996	0.888438	salmon
TEA008672	0.893264	salmon
TEA024473	0.874104	salmon
TEA012306	-0.585794	salmon
TEA027869	0.824465	salmon
TEA004674	0.854804	salmon
TEA022351	0.732334	salmon
TEA019767	0.740765	salmon
TEA029453	0.748581	salmon
TEA024391	0.855181	salmon
TEA020120	0.739641	salmon
TEA017964	-0.783217	salmon
TEA013116	-0.885291	salmon
TEA013455	0.778305	salmon
TEA010727	-0.697443	salmon
TEA002188	-0.925007	salmon
TEA021008	0.807497	salmon
TEA002611	0.732047	brown
TEA006867	0.825223	brown
TEA004730	0.624999	brown
TEA028092	0.742089	brown
TEA023451	-0.718142	brown
TEA031641	0.687499	brown
TEA028864	0.857158	brown
TEA009085	0.752118	brown
TEA014254	0.706856	brown
TEA025734	-0.696778	brown
TEA020808	0.553691	brown
TEA022966	0.946189	brown
TEA023087	0.961074	brown
TEA016861	0.885148	brown
TEA004454	0.915017	brown
TEA011144	0.807002	brown
TEA027103	0.67871	brown
TEA001625	0.944517	brown
TEA032123	0.778447	brown
TEA029860	0.722601	brown
TEA008128	-0.926755	brown
TEA009874	0.910904	brown
TEA009236	0.805633	brown
TEA018135	0.756869	brown
TEA030207	0.9487	brown
TEA007260	0.919789	brown
TEA001868	0.856781	brown
TEA006565	-0.875591	brown
TEA033211	0.794899	brown
TEA011459	0.871134	brown
TEA028585	-0.928442	brown
TEA007470	0.882475	brown
TEA010135	0.916419	brown
TEA014780	-0.75791	brown
TEA019203	0.842868	brown
TEA023586	0.789421	brown
TEA031688	0.908707	brown
TEA032977	0.834314	brown
TEA028298	-0.918179	brown
TEA008273	-0.891041	brown
TEA030101	-0.891598	brown
TEA020173	0.750535	brown
TEA025550	0.868323	brown
TEA019342	-0.855297	brown
TEA019211	0.911041	brown
TEA030314	0.647739	brown
TEA003545	-0.916324	brown
TEA019812	0.610912	brown
TEA023717	0.792148	brown
TEA010078	0.680899	brown
TEA000882	0.851067	brown
TEA002789	0.872315	brown
TEA008673	0.934224	brown
TEA030361	0.887132	brown
TEA011393	0.773954	brown
TEA016079	0.856	brown
TEA008412	0.797306	brown
TEA003121	0.928755	brown
TEA011869	-0.83111	brown
TEA018287	0.839323	brown
TEA003821	-0.883849	brown
TEA031422	-0.797248	brown
TEA008264	-0.67688	brown
TEA006731	-0.893143	brown
TEA019020	0.873591	brown
TEA016514	0.867311	brown
TEA021163	-0.884448	brown
TEA025289	-0.823636	brown
TEA016637	0.860237	brown
TEA004863	0.904949	brown
TEA013199	0.766818	brown
TEA012307	0.922546	brown
TEA023582	0.799274	brown
TEA023726	0.879953	brown
TEA034056	0.906803	brown
TEA019726	0.943678	brown
TEA024175	0.819025	brown
TEA016526	0.843168	brown
TEA002857	0.966666	brown
TEA033656	0.905198	brown
TEA008366	-0.631267	brown
TEA001859	0.775625	brown
TEA004435	0.728044	brown
TEA026433	0.808407	brown
TEA005520	-0.932374	brown
TEA034001	-0.64395	brown
TEA004714	-0.922959	brown
TEA007017	0.857329	brown
TEA033269	0.774698	brown
TEA019328	0.90068	brown
TEA004837	0.910544	brown
TEA009058	0.889809	brown
TEA013611	-0.802951	brown
TEA020512	0.863133	brown
TEA029037	0.868351	brown
TEA015809	-0.940399	brown
TEA000289	0.608654	brown
TEA004817	-0.672392	brown
TEA026757	0.757663	brown
TEA032812	0.914464	brown
TEA015139	0.805497	brown
TEA008508	0.522092	brown
TEA031019	0.935302	brown
TEA019688	0.818424	brown
TEA011048	-0.903624	brown
TEA033866	-0.389703	brown
TEA003486	0.90288	brown
TEA005950	-0.922562	brown
TEA015036	-0.67616	brown
TEA007932	-0.866868	brown
TEA002323	0.484346	brown
TEA022872	0.88058	brown
TEA017340	-0.864106	brown
TEA026604	0.878802	brown
TEA022090	-0.423861	brown
TEA003128	-0.813898	brown
TEA009812	0.445762	brown
TEA006613	-0.442281	brown
TEA009293	0.895359	brown
TEA015220	0.791111	brown
TEA024605	0.415329	brown
TEA001815	-0.745418	brown
TEA032884	-0.743773	brown
TEA002184	0.735568	brown
TEA020208	-0.861118	brown
TEA018712	0.94511	brown
TEA012258	0.95148	brown
TEA021609	0.83489	brown
TEA032421	-0.821267	brown
TEA006005	-0.837334	brown
TEA030347	0.829711	brown
TEA017752	0.89603	brown
TEA031016	-0.818837	brown
TEA007342	0.901702	brown
TEA033709	0.939659	brown
TEA012137	-0.850821	brown
TEA024979	-0.894111	brown
TEA012577	-0.924765	brown
TEA003813	0.878863	brown
TEA031703	0.730874	brown
TEA025718	-0.760445	brown
TEA003610	0.883732	brown
TEA003095	-0.879503	brown
TEA001179	0.64696	brown
TEA031612	0.878043	brown
TEA003834	0.89973	brown
TEA010946	-0.931258	brown
TEA001003	0.958249	brown
TEA000896	0.835539	brown
TEA031606	-0.892649	brown
TEA007647	-0.845482	brown
TEA006963	-0.804798	brown
TEA028503	0.907078	brown
TEA008939	0.889793	brown
TEA031280	-0.77847	brown
TEA014118	0.675859	brown
TEA007554	0.711101	brown
TEA000433	-0.781373	brown
TEA027490	-0.629944	brown
TEA015810	0.790294	brown
TEA033898	0.409065	brown
TEA001820	0.469901	brown
TEA019043	0.915239	brown
TEA032572	0.729031	brown
TEA022357	0.628535	brown
TEA013511	-0.560674	brown
TEA006775	0.842497	brown
TEA000225	-0.870113	brown
TEA010268	-0.953418	brown
TEA013926	-0.885417	brown
TEA008305	-0.67762	brown
TEA026935	0.666057	brown
TEA007948	0.940757	brown
TEA033543	0.934163	brown
TEA024644	0.575508	brown
TEA009419	-0.764969	brown
TEA005710	0.793771	brown
TEA006224	-0.80428	brown
TEA014810	0.903726	brown
TEA013552	-0.92316	brown
TEA001415	-0.741447	brown
TEA013608	-0.888598	brown
TEA006902	0.812295	brown
TEA024158	-0.812664	brown
TEA000196	-0.728485	brown
TEA007650	0.83207	brown
TEA002414	-0.614025	brown
TEA033761	0.898269	brown
TEA030334	0.870188	brown
TEA022796	-0.537799	brown
TEA025336	0.771869	brown
TEA020878	0.855688	brown
TEA028005	0.706509	brown
TEA006753	-0.639218	brown
TEA004296	-0.738267	brown
TEA003835	-0.922506	brown
TEA030557	-0.694718	brown
TEA017877	-0.717821	brown
TEA009561	0.588643	brown
TEA000141	-0.911514	brown
TEA000460	0.918656	brown
TEA027751	-0.9007	brown
TEA020751	0.540035	brown
TEA011828	0.771337	brown
TEA028597	0.789611	brown
TEA010192	0.856424	brown
TEA025489	-0.862132	brown
TEA018832	-0.63035	brown
TEA027671	-0.743612	brown
TEA020714	0.606051	brown
TEA005410	-0.650562	brown
TEA009418	-0.87664	brown
TEA001069	0.832144	brown
TEA019911	-0.94426	brown
TEA027654	0.913948	brown
TEA020601	-0.50332	brown
TEA003867	-0.909415	brown
TEA023135	-0.890844	brown
TEA027130	-0.826012	brown
TEA006283	-0.782356	brown
TEA006029	0.860478	brown
TEA024031	-0.734269	brown
TEA002097	-0.796239	brown
TEA031562	-0.885896	brown
TEA023503	0.936712	brown
TEA018886	0.739235	brown
TEA029097	0.674464	brown
TEA001216	-0.94514	brown
TEA006361	-0.518552	brown
TEA015076	-0.769486	brown
TEA007626	0.731222	brown
TEA009763	-0.955256	brown
TEA031031	0.409508	brown
TEA017095	-0.781682	brown
TEA032205	-0.874661	brown
TEA018203	0.744423	brown
TEA019482	-0.908888	brown
TEA018545	0.825328	brown
TEA030444	-0.771609	brown
TEA030977	-0.964047	brown
TEA028402	0.828578	brown
TEA012580	-0.845841	brown
TEA018941	0.601986	brown
TEA007128	-0.591194	brown
TEA011872	-0.846071	brown
TEA003344	-0.717308	brown
TEA023545	-0.824252	brown
TEA005221	-0.813374	brown
TEA014543	-0.871959	brown
TEA005793	0.630286	brown
TEA033397	0.895331	brown
TEA023345	-0.56093	brown
TEA020385	0.8497	brown
TEA003575	-0.77169	brown
TEA012139	0.914975	brown
TEA024292	-0.761355	brown
TEA018061	0.751471	brown
TEA008844	0.912673	brown
TEA012649	0.47334	brown
TEA002486	0.671901	brown
TEA018315	0.910596	brown
TEA032829	0.54611	brown
TEA025775	-0.747214	brown
TEA030046	-0.79568	brown
TEA017116	0.965944	brown
TEA029303	-0.788122	brown
TEA020942	-0.495384	brown
TEA028390	-0.89802	brown
TEA006190	-0.865982	brown
TEA033847	-0.813372	brown
TEA024342	0.7099	brown
TEA022334	-0.83178	brown
TEA015108	0.59831	brown
TEA022954	0.721639	brown
TEA017768	0.908462	brown
TEA030122	0.924643	brown
TEA033220	0.749931	brown
TEA023163	-0.936652	brown
TEA006714	-0.894455	brown
TEA033122	0.550462	brown
TEA027173	-0.968065	brown
TEA005006	-0.580719	brown
TEA031931	-0.74994	brown
TEA001552	0.628686	brown
TEA001580	-0.842797	brown
TEA021820	-0.698137	brown
TEA008253	0.517695	brown
TEA008357	-0.885764	brown
TEA006747	0.896562	brown
TEA010973	0.937458	brown
TEA023095	0.925287	brown
TEA010206	0.712114	brown
TEA032099	-0.64665	brown
TEA002956	-0.874544	brown
TEA027374	0.823584	brown
TEA027557	-0.428086	brown
TEA032861	0.701659	brown
TEA008288	0.691866	brown
TEA028347	-0.876374	brown
TEA025706	-0.815072	brown
TEA013769	-0.380037	brown
TEA024752	0.71622	brown
TEA015886	0.600364	brown
TEA000831	0.715078	brown
TEA025868	0.867822	green
TEA023082	0.977671	green
TEA027857	0.81019	green
TEA017355	-0.83993	green
TEA001494	-0.745053	green
TEA031535	0.980506	green
TEA033180	0.889262	green
TEA002796	-0.80307	green
TEA027892	0.925408	green
TEA010749	0.843193	green
TEA020625	0.978464	green
TEA003419	0.799492	green
TEA007223	0.763754	green
TEA027652	-0.926137	green
TEA025413	0.930371	green
TEA012581	0.988563	green
TEA002518	0.813938	green
TEA022500	0.932065	green
TEA011018	-0.871787	green
TEA006799	-0.929984	green
TEA010980	0.906467	green
TEA029278	-0.866985	green
TEA016566	0.753687	green
TEA014418	0.920684	green
TEA030562	-0.89459	green
TEA008208	-0.861904	green
TEA021546	0.885418	green
TEA029417	-0.888895	green
TEA028492	0.843435	green
TEA026783	0.628001	green
TEA010123	0.906424	green
TEA016942	-0.812454	green
TEA022485	0.948645	green
TEA023307	-0.788063	green
TEA027528	0.896107	green
TEA021744	0.94015	green
TEA027659	0.906803	green
TEA017333	0.826655	green
TEA030293	0.800658	green
TEA015163	0.756973	green
TEA013018	0.721007	green
TEA005890	0.87447	green
TEA021203	0.662151	green
TEA027842	0.949103	green
TEA007155	0.781197	green
TEA012224	0.915947	green
TEA003250	0.967269	green
TEA032730	0.969817	green
TEA016097	-0.913026	green
TEA003558	0.916266	green
TEA018957	0.849002	green
TEA019504	-0.830649	green
TEA007476	0.881794	green
TEA011624	0.859876	green
TEA005652	-0.919445	green
TEA012902	0.750691	green
TEA019582	-0.60311	green
TEA014398	-0.917974	green
TEA014249	0.857043	green
TEA028601	-0.769471	green
TEA026224	0.94473	green
TEA004752	0.780956	green
TEA030381	-0.725762	green
TEA020689	0.903741	green
TEA005262	-0.944806	green
TEA014174	-0.754646	green
TEA030866	0.806248	green
TEA029889	0.929367	green
TEA010389	0.951209	green
TEA028422	-0.854464	green
TEA026237	-0.911461	green
TEA022671	0.966582	green
TEA003354	0.902688	green
TEA011200	0.924912	green
TEA003364	0.811449	green
TEA014639	0.827677	green
TEA032303	0.920795	green
TEA024275	-0.721668	green
TEA008531	0.840026	green
TEA015247	0.629683	green
TEA025067	0.91177	green
TEA009872	0.783964	green
TEA006014	0.873636	green
TEA027105	-0.898836	green
TEA008299	-0.78303	green
TEA008016	0.874536	green
TEA024721	-0.784248	green
TEA010493	0.898889	green
TEA027179	-0.820874	green
TEA010905	0.807498	green
TEA001852	-0.857264	green
TEA026542	0.427846	green
TEA007269	0.877696	green
TEA021028	-0.68812	green
TEA018962	-0.962257	green
TEA034012	0.824682	green
TEA014542	-0.731692	green
TEA028998	0.832414	green
TEA023465	0.90624	green
TEA029345	-0.714302	green
TEA013281	0.832451	green
TEA018438	0.671698	green
TEA012467	-0.880348	green
TEA032037	0.90544	green
TEA000773	-0.767849	green
TEA004631	-0.700345	green
TEA032602	-0.927139	green
TEA019090	0.830922	green
TEA028263	-0.847672	green
TEA001843	-0.839802	green
TEA014692	-0.813338	green
TEA032265	-0.950521	green
TEA006208	0.970422	green
TEA017813	0.836049	green
TEA015077	0.915778	green
TEA016927	-0.814842	green
TEA028941	-0.922657	green
TEA029950	-0.503761	green
TEA018188	-0.89419	green
TEA029038	0.584603	green
TEA010915	0.935273	green
TEA009853	0.863792	green
TEA031128	-0.791855	green
TEA007401	-0.557278	green
TEA012231	-0.843305	green
TEA020380	-0.76714	green
TEA026360	0.702752	green
TEA033296	-0.937898	green
TEA010272	0.831701	green
TEA020718	0.941068	green
TEA000772	-0.796697	green
TEA029454	-0.815988	green
TEA008755	-0.766255	green
TEA021421	0.839683	green
TEA012390	-0.945943	green
TEA005737	0.644379	green
TEA017540	-0.814045	green
TEA024433	0.807428	green
TEA016188	0.784599	green
TEA012981	-0.878005	green
TEA026492	-0.788899	green
TEA008326	0.585425	green
TEA029349	-0.850294	green
TEA017985	0.910572	green
TEA016279	0.980452	green
TEA025335	-0.892651	green
TEA021971	-0.928197	green
TEA020324	0.928029	green
TEA000673	0.986617	green
TEA024441	-0.684383	green
TEA012147	-0.773334	green
TEA006240	-0.850025	green
TEA019261	0.718885	green
TEA007896	0.577348	green
TEA025832	-0.622771	green
TEA017783	0.925727	green
TEA018984	-0.933645	green
TEA013023	0.905671	green
TEA028890	-0.806696	green
TEA010106	0.748887	green
TEA025405	-0.691703	green
TEA002854	0.907311	green
TEA026425	-0.717947	green
TEA011635	-0.847061	green
TEA021588	-0.625201	green
TEA033258	-0.917035	green
TEA017326	0.88023	green
TEA022038	-0.769536	green
TEA029790	0.854124	green
TEA005856	0.651004	green
TEA031601	0.707488	green
TEA031007	-0.91507	green
TEA001526	-0.807637	green
TEA001724	-0.86391	green
TEA015253	-0.891474	green
TEA016056	0.902476	green
TEA029734	0.848241	green
TEA026685	-0.875705	green
TEA000360	0.745308	green
TEA010971	0.757981	green
TEA025356	0.786244	green
TEA019610	-0.7201	green
TEA019936	0.712963	green
TEA030952	0.907928	green
TEA029299	0.572915	green
TEA029922	0.801486	green
TEA003796	-0.883349	green
TEA031325	-0.829193	green
TEA015046	0.895252	green
TEA027487	0.930865	green
TEA018451	0.842356	green
TEA021429	0.92574	turquoise
TEA006264	0.938803	turquoise
TEA033053	-0.916032	turquoise
TEA000218	0.919989	turquoise
TEA007200	0.98769	turquoise
TEA017144	-0.620076	turquoise
TEA000214	0.983128	turquoise
TEA032780	-0.915987	turquoise
TEA022183	-0.867846	turquoise
TEA018223	0.933735	turquoise
TEA006051	0.94863	turquoise
TEA022152	-0.734191	turquoise
TEA007938	0.843653	turquoise
TEA021632	0.784385	turquoise
TEA003992	0.859998	turquoise
TEA005970	0.98426	turquoise
TEA008887	0.880736	turquoise
TEA023884	0.755658	turquoise
TEA013475	0.965712	turquoise
TEA024181	0.918569	turquoise
TEA009770	-0.395681	turquoise
TEA032553	0.912425	turquoise
TEA003103	0.989031	turquoise
TEA001039	0.929626	turquoise
TEA028541	-0.453802	turquoise
TEA019908	0.948904	turquoise
TEA016578	0.917943	turquoise
TEA030131	0.847387	turquoise
TEA012727	0.938527	turquoise
TEA027113	0.976446	turquoise
TEA022542	0.948565	turquoise
TEA032381	-0.878649	turquoise
TEA026035	0.909023	turquoise
TEA009759	0.972581	turquoise
TEA015624	-0.926937	turquoise
TEA031676	0.918032	turquoise
TEA032087	-0.904793	turquoise
TEA007566	0.964106	turquoise
TEA004342	-0.850817	turquoise
TEA023497	-0.7571	turquoise
TEA004994	-0.933626	turquoise
TEA027502	0.873696	turquoise
TEA001672	-0.65012	turquoise
TEA000309	-0.820161	turquoise
TEA008283	0.868047	turquoise
TEA033504	0.984881	turquoise
TEA014732	0.940058	turquoise
TEA018839	0.972312	turquoise
TEA018031	0.952345	turquoise
TEA023127	0.894239	turquoise
TEA024679	-0.954824	turquoise
TEA030523	-0.94367	turquoise
TEA013044	0.971248	turquoise
TEA006171	0.927337	turquoise
TEA013516	0.940676	turquoise
TEA010755	-0.930314	turquoise
TEA032678	-0.813556	turquoise
TEA031065	0.879721	turquoise
TEA023519	0.969185	turquoise
TEA002986	0.85072	turquoise
TEA017102	0.975068	turquoise
TEA013679	-0.836165	turquoise
TEA012023	-0.905875	turquoise
TEA006522	0.941006	turquoise
TEA021970	-0.743129	turquoise
TEA014837	-0.75975	turquoise
TEA029641	0.935096	turquoise
TEA019140	0.94673	turquoise
TEA005682	0.930767	turquoise
TEA012043	-0.825575	turquoise
TEA028709	0.892533	turquoise
TEA029527	0.952393	turquoise
TEA008904	-0.820951	turquoise
TEA033031	0.568299	turquoise
TEA023090	0.992906	turquoise
TEA020362	-0.908494	turquoise
TEA027003	-0.948037	turquoise
TEA032691	-0.939212	turquoise
TEA016148	0.983979	turquoise
TEA030970	0.973315	turquoise
TEA020005	0.959343	turquoise
TEA017002	0.971513	turquoise
TEA019216	0.9767	turquoise
TEA020856	-0.981333	turquoise
TEA017058	0.909866	turquoise
TEA023490	0.96637	turquoise
TEA010401	0.987274	turquoise
TEA014367	-0.567374	turquoise
TEA014859	0.992861	turquoise
TEA006056	0.885559	turquoise
TEA017289	-0.964444	turquoise
TEA011860	0.948537	turquoise
TEA014885	0.899407	turquoise
TEA017114	-0.816765	turquoise
TEA016627	0.992622	turquoise
TEA017533	0.941739	turquoise
TEA032499	-0.702552	turquoise
TEA016117	-0.713103	turquoise
TEA009991	-0.630892	turquoise
TEA010778	0.944913	turquoise
TEA020567	0.922131	turquoise
TEA021409	0.928916	turquoise
TEA025694	0.904433	turquoise
TEA025936	0.967399	turquoise
TEA005964	-0.687857	turquoise
TEA021289	-0.918503	turquoise
TEA008467	0.962475	turquoise
TEA023404	0.946755	turquoise
TEA005300	-0.867728	turquoise
TEA002598	0.960759	turquoise
TEA008173	0.993354	turquoise
TEA004709	-0.859769	turquoise
TEA000580	0.848393	turquoise
TEA004762	0.894569	turquoise
TEA001569	0.818415	turquoise
TEA024925	-0.74666	turquoise
TEA024827	0.958277	turquoise
TEA015622	0.972969	turquoise
TEA030607	-0.933471	turquoise
TEA019546	-0.911405	turquoise
TEA026549	-0.877323	turquoise
TEA008157	-0.877006	turquoise
TEA028077	0.940833	turquoise
TEA029032	-0.894475	turquoise
TEA026705	0.98125	turquoise
TEA014755	-0.734983	turquoise
TEA019776	-0.898444	turquoise
TEA001647	0.963136	turquoise
TEA011119	0.898394	turquoise
TEA022621	0.936186	turquoise
TEA005320	0.826036	turquoise
TEA015484	0.638493	turquoise
TEA001261	0.858499	turquoise
TEA006095	0.796402	turquoise
TEA018859	0.994018	turquoise
TEA005101	0.669513	turquoise
TEA010968	0.854512	turquoise
TEA031512	-0.858659	turquoise
TEA016461	0.990829	turquoise
TEA033434	-0.468176	turquoise
TEA001393	0.954339	turquoise
TEA008504	0.902509	turquoise
TEA027034	0.961405	turquoise
TEA003598	0.967005	turquoise
TEA018625	0.995883	turquoise
TEA015229	-0.872138	turquoise
TEA031579	-0.964268	turquoise
TEA018256	0.973517	turquoise
TEA016286	0.729954	turquoise
TEA001138	-0.901208	turquoise
TEA004098	0.894736	turquoise
TEA001215	0.92743	turquoise
TEA006070	0.929145	turquoise
TEA006847	0.835189	turquoise
TEA010316	0.960045	turquoise
TEA015560	-0.487599	turquoise
TEA021219	0.990974	turquoise
TEA017218	0.962715	turquoise
TEA021907	-0.914353	turquoise
TEA009430	0.846105	turquoise
TEA013890	0.578443	turquoise
TEA014717	0.906731	turquoise
TEA008679	0.900643	turquoise
TEA018356	0.900999	turquoise
TEA015906	0.914439	turquoise
TEA001905	-0.529627	turquoise
TEA027687	0.959193	turquoise
TEA028254	0.940223	turquoise
TEA006863	0.836391	turquoise
TEA001740	0.991603	turquoise
TEA013493	-0.899393	turquoise
TEA011958	0.974576	turquoise
TEA015958	0.968091	turquoise
TEA027790	0.792295	turquoise
TEA014482	0.653466	turquoise
TEA011402	0.912442	turquoise
TEA012075	-0.730331	turquoise
TEA015706	0.907717	turquoise
TEA011254	0.988896	turquoise
TEA030785	-0.91252	turquoise
TEA016973	0.888348	turquoise
TEA014833	0.914026	turquoise
TEA024897	0.910807	turquoise
TEA011664	0.909787	turquoise
TEA024785	0.247445	turquoise
TEA011511	-0.507219	turquoise
TEA033134	-0.856558	turquoise
TEA020290	0.68249	turquoise
TEA011605	0.835147	turquoise
TEA004633	0.975648	turquoise
TEA004405	-0.890882	turquoise
TEA006822	0.978664	turquoise
TEA027114	-0.860504	turquoise
TEA024137	0.908599	turquoise
TEA032405	0.796975	turquoise
TEA011507	-0.937237	turquoise
TEA011901	0.936708	turquoise
TEA022805	-0.882443	turquoise
TEA027477	0.87902	turquoise
TEA027258	0.940953	turquoise
TEA011328	0.929031	turquoise
TEA002105	0.648724	turquoise
TEA014141	-0.841948	turquoise
TEA033130	-0.941989	turquoise
TEA007113	0.938158	turquoise
TEA032425	-0.979712	turquoise
TEA006436	0.929463	turquoise
TEA034028	0.387843	turquoise
TEA016289	-0.941868	turquoise
TEA010235	0.856772	turquoise
TEA015234	-0.410329	turquoise
TEA026978	0.964672	turquoise
TEA018649	-0.899889	turquoise
TEA029083	0.914772	turquoise
TEA023767	0.980253	turquoise
TEA010829	0.592162	turquoise
TEA014576	-0.92161	turquoise
TEA003940	-0.872714	turquoise
TEA009082	-0.854664	turquoise
TEA006851	0.967376	turquoise
TEA021529	-0.866017	turquoise
TEA017147	-0.568783	turquoise
TEA031575	0.905265	turquoise
TEA027408	-0.365642	turquoise
TEA033141	0.900962	turquoise
TEA002973	0.991308	turquoise
TEA000254	0.915706	turquoise
TEA029054	0.937377	turquoise
TEA030945	-0.977278	turquoise
TEA032564	0.966081	turquoise
TEA033714	0.768391	turquoise
TEA015801	0.985833	turquoise
TEA032624	0.763165	turquoise
TEA008011	-0.852382	turquoise
TEA007732	0.936117	turquoise
TEA012057	0.921756	turquoise
TEA000341	0.627368	turquoise
TEA007157	0.942773	turquoise
TEA018040	-0.818524	turquoise
TEA027323	-0.773425	turquoise
TEA020546	0.656785	turquoise
TEA026520	0.961029	turquoise
TEA010954	-0.892115	turquoise
TEA000195	-0.858688	turquoise
TEA004969	0.977424	turquoise
TEA024338	0.961152	turquoise
TEA028547	0.916958	turquoise
TEA024903	0.9764	turquoise
TEA013499	0.975438	turquoise
TEA005225	0.917482	turquoise
TEA003902	-0.877646	turquoise
TEA015866	-0.866686	turquoise
TEA007300	0.941201	turquoise
TEA010760	-0.91898	turquoise
TEA029419	-0.91719	turquoise
TEA006500	0.922751	turquoise
TEA021594	0.93022	turquoise
TEA032903	0.598423	turquoise
TEA009390	0.897862	turquoise
TEA030397	-0.883355	turquoise
TEA033356	0.867281	turquoise
TEA013950	0.90251	turquoise
TEA001911	-0.294907	turquoise
TEA013048	0.889331	turquoise
TEA015695	0.956993	turquoise
TEA027925	-0.825217	turquoise
TEA024267	0.916834	turquoise
TEA016073	0.906267	turquoise
TEA028074	0.933883	turquoise
TEA014443	0.883432	turquoise
TEA019838	0.539132	turquoise
TEA005098	0.783456	turquoise
TEA011117	-0.792383	turquoise
TEA014759	-0.947875	turquoise
TEA011891	0.910435	turquoise
TEA033289	0.907931	turquoise
TEA020693	-0.9386	turquoise
TEA007252	-0.754591	turquoise
TEA002344	-0.894256	turquoise
TEA018687	0.860439	turquoise
TEA012160	0.922066	turquoise
TEA006609	0.971619	turquoise
TEA020912	-0.899509	turquoise
TEA021397	-0.838611	turquoise
TEA014561	-0.904338	turquoise
TEA009596	0.983347	turquoise
TEA032018	0.920604	turquoise
TEA002446	0.883328	turquoise
TEA029155	0.786079	turquoise
TEA010039	-0.9036	turquoise
TEA000904	0.955232	turquoise
TEA022402	0.943642	turquoise
TEA011505	0.881353	turquoise
TEA024701	-0.887914	turquoise
TEA019969	0.823447	turquoise
TEA026343	0.98835	turquoise
TEA023976	0.945605	turquoise
TEA028590	0.968936	turquoise
TEA015666	0.494382	turquoise
TEA016202	-0.949648	turquoise
TEA012582	0.910244	turquoise
TEA017091	-0.833616	turquoise
TEA008982	0.846186	turquoise
TEA025278	-0.32432	turquoise
TEA015899	-0.821978	turquoise
TEA003363	0.845892	turquoise
TEA027126	0.978997	turquoise
TEA016534	0.802396	turquoise
TEA000905	0.969149	turquoise
TEA012601	0.897094	turquoise
TEA004956	0.76569	turquoise
TEA011120	0.919895	turquoise
TEA018998	-0.597936	turquoise
TEA022864	0.972019	turquoise
TEA025286	-0.941269	turquoise
TEA031756	0.921599	turquoise
TEA028075	0.685381	turquoise
TEA010137	0.940795	turquoise
TEA029580	0.766995	turquoise
TEA027322	0.945817	turquoise
TEA011747	0.974442	turquoise
TEA023889	0.968654	turquoise
TEA011512	0.487268	turquoise
TEA016161	0.968849	turquoise
TEA006636	-0.805864	turquoise
TEA010088	0.569349	turquoise
TEA025699	0.976558	turquoise
TEA010494	0.629423	turquoise
TEA026116	0.967708	turquoise
TEA012442	0.898774	turquoise
TEA009810	0.88804	turquoise
TEA007887	0.872221	turquoise
TEA032130	-0.952525	turquoise
TEA013908	-0.872925	turquoise
TEA020975	0.831611	turquoise
TEA000885	0.950425	turquoise
TEA030009	0.989842	turquoise
TEA022095	0.932691	turquoise
TEA007723	0.986911	turquoise
TEA030194	0.914848	turquoise
TEA012597	0.965699	turquoise
TEA018076	0.866355	turquoise
TEA027401	-0.950813	turquoise
TEA000593	-0.852064	turquoise
TEA017536	0.941237	turquoise
TEA012712	0.947058	turquoise
TEA017099	0.950636	turquoise
TEA021095	0.974915	turquoise
TEA008879	0.489182	turquoise
TEA016038	0.96897	turquoise
TEA000695	0.979345	turquoise
TEA001288	-0.882295	turquoise
TEA001623	0.925472	turquoise
TEA025758	0.626822	turquoise
TEA012784	-0.91048	turquoise
TEA022918	0.96604	turquoise
TEA000931	0.985298	turquoise
TEA031056	0.896265	turquoise
TEA026075	0.846729	turquoise
TEA004140	0.968174	turquoise
TEA010999	-0.933155	turquoise
TEA026852	0.965795	turquoise
TEA009489	0.568145	turquoise
TEA012389	0.738612	turquoise
TEA007220	0.981892	turquoise
TEA031818	-0.514395	turquoise
TEA023471	-0.809388	turquoise
TEA026638	0.308996	turquoise
TEA025557	-0.89593	turquoise
TEA015205	0.570715	turquoise
TEA023136	0.938162	turquoise
TEA030871	0.909504	turquoise
TEA016463	-0.65218	turquoise
TEA004913	0.863373	turquoise
TEA017296	-0.769746	turquoise
TEA032654	0.953991	turquoise
TEA027599	0.687809	turquoise
TEA003466	0.868547	turquoise
TEA004595	0.952406	turquoise
TEA004603	-0.917476	turquoise
TEA010810	-0.807764	turquoise
TEA009552	0.882019	turquoise
TEA012388	0.886411	turquoise
TEA025017	0.974012	turquoise
TEA005053	0.906862	turquoise
TEA000589	-0.775924	turquoise
TEA023139	-0.511878	turquoise
TEA033219	-0.454106	turquoise
TEA011139	0.957004	turquoise
TEA032196	-0.866574	turquoise
TEA018963	0.932695	turquoise
TEA009514	-0.699878	turquoise
TEA013090	-0.846374	turquoise
TEA031613	0.77657	turquoise
TEA032753	-0.755335	turquoise
TEA021925	-0.877321	turquoise
TEA003860	0.984491	turquoise
TEA005816	0.92141	turquoise
TEA005863	0.848082	turquoise
TEA027913	0.904595	turquoise
TEA019470	-0.785297	turquoise
TEA022543	-0.93499	turquoise
TEA024754	-0.915951	turquoise
TEA025902	-0.880907	turquoise
TEA008441	0.879426	turquoise
TEA003560	-0.716607	turquoise
TEA006061	-0.878236	turquoise
TEA019425	-0.860003	turquoise
TEA001719	0.879949	turquoise
TEA003965	-0.944485	turquoise
TEA031544	0.775635	turquoise
TEA027192	0.944773	turquoise
TEA010365	0.959924	turquoise
TEA031348	-0.937396	turquoise
TEA004072	-0.889743	turquoise
TEA001094	-0.918478	turquoise
TEA001376	0.938658	turquoise
TEA027503	0.789534	turquoise
TEA021993	-0.896741	turquoise
TEA011743	-0.822481	turquoise
TEA026934	0.814015	turquoise
TEA013001	-0.932175	turquoise
TEA006518	0.922241	turquoise
TEA030315	0.844545	turquoise
TEA000888	0.6974	turquoise
TEA017010	-0.695041	turquoise
TEA025904	-0.576549	turquoise
TEA021359	-0.925066	turquoise
TEA011078	0.644167	turquoise
TEA011713	0.979021	turquoise
TEA027648	-0.923053	turquoise
TEA015336	-0.883094	turquoise
TEA032416	-0.924117	turquoise
TEA009387	0.921454	turquoise
TEA033470	0.7221	turquoise
TEA011037	0.87457	turquoise
TEA000910	0.966411	turquoise
TEA026146	0.520981	turquoise
TEA002779	-0.951977	turquoise
TEA026583	0.707815	turquoise
TEA031550	0.405781	turquoise
TEA024832	0.964191	turquoise
TEA010674	-0.938342	turquoise
TEA023530	0.961782	turquoise
TEA002095	0.944564	turquoise
TEA026779	0.851535	turquoise
TEA014150	0.98212	turquoise
TEA024075	-0.979955	turquoise
TEA017033	-0.806667	turquoise
TEA025309	0.961576	turquoise
TEA028739	0.729828	turquoise
TEA023167	0.729679	turquoise
TEA020702	0.984015	turquoise
TEA014526	0.403886	turquoise
TEA024077	-0.906355	turquoise
TEA032224	0.619407	turquoise
TEA022520	-0.902151	turquoise
TEA017278	0.93734	turquoise
TEA029432	-0.960633	turquoise
TEA011188	0.798826	turquoise
TEA029461	0.928684	turquoise
TEA030485	-0.911582	turquoise
TEA001827	-0.873256	turquoise
TEA019358	0.919278	turquoise
TEA018409	-0.773644	turquoise
TEA022471	-0.574022	turquoise
TEA004965	-0.93112	turquoise
TEA031974	-0.946127	turquoise
TEA013106	-0.96038	turquoise
TEA001167	-0.418796	turquoise
TEA003753	0.878874	turquoise
TEA024448	0.924339	turquoise
TEA017464	0.906038	turquoise
TEA025844	-0.366025	turquoise
TEA030552	0.543519	turquoise
TEA008403	-0.737913	turquoise
TEA026025	-0.745057	turquoise
TEA022753	0.974934	turquoise
TEA024657	0.828565	turquoise
TEA005428	-0.327503	turquoise
TEA017689	-0.956424	turquoise
TEA009327	-0.803932	turquoise
TEA030260	-0.340369	turquoise
TEA021498	-0.814281	turquoise
TEA023934	0.908083	turquoise
TEA018391	0.74306	turquoise
TEA014377	0.781026	turquoise
TEA028727	-0.863295	turquoise
TEA017779	-0.872363	turquoise
TEA001529	-0.805918	turquoise
TEA007143	0.906642	turquoise
TEA017744	0.725888	turquoise
TEA010133	0.960512	turquoise
TEA019462	-0.590082	turquoise
TEA019855	0.91992	turquoise
TEA000037	-0.788931	turquoise
TEA019753	-0.895943	turquoise
TEA024061	0.98645	turquoise
TEA032059	0.985165	turquoise
TEA023207	-0.733626	turquoise
TEA017349	0.469697	turquoise
TEA014745	0.928686	turquoise
TEA018389	-0.886455	turquoise
TEA009250	-0.866409	turquoise
TEA011709	-0.923968	turquoise
TEA018217	0.702444	turquoise
TEA005765	0.970044	turquoise
TEA008056	-0.633882	turquoise
TEA016715	0.813267	turquoise
TEA023390	-0.694122	turquoise
TEA007716	0.934783	turquoise
TEA032465	0.676686	turquoise
TEA017668	0.914002	turquoise
TEA014845	-0.84174	turquoise
TEA005995	-0.921508	turquoise
TEA018804	-0.668232	turquoise
TEA007163	0.992045	turquoise
TEA011322	-0.906569	turquoise
TEA021038	0.971994	turquoise
TEA021496	0.408912	turquoise
TEA028158	0.685701	turquoise
TEA023093	0.803527	turquoise
TEA000647	0.85981	turquoise
TEA028549	-0.822812	turquoise
TEA000080	-0.606736	turquoise
TEA025786	0.850039	turquoise
TEA021089	0.976956	turquoise
TEA026572	-0.898432	turquoise
TEA005494	0.962621	turquoise
TEA004784	0.952314	turquoise
TEA031718	0.444579	turquoise
TEA028839	0.967838	turquoise
TEA027521	0.95737	turquoise
TEA003154	0.793089	turquoise
TEA033494	0.681829	turquoise
TEA002788	0.97523	turquoise
TEA000197	-0.94677	turquoise
TEA020797	0.929746	turquoise
TEA003177	0.702333	turquoise
TEA015888	-0.940766	turquoise
TEA001086	0.707174	turquoise
TEA026911	-0.861384	turquoise
TEA010022	-0.973241	turquoise
TEA014339	-0.902574	turquoise
TEA029954	0.913742	turquoise
TEA027535	0.939795	turquoise
TEA017478	0.905345	turquoise
TEA008825	-0.824626	turquoise
TEA034016	0.867112	turquoise
TEA014659	0.633617	turquoise
TEA018919	0.738494	turquoise
TEA019618	0.690961	turquoise
TEA024693	0.716151	turquoise
TEA022144	-0.574164	turquoise
TEA016454	0.964461	turquoise
TEA033081	-0.896593	turquoise
TEA022376	0.83378	turquoise
TEA020642	0.859845	turquoise
TEA013140	-0.61835	turquoise
TEA016465	0.800841	turquoise
TEA007381	0.929249	turquoise
TEA025865	0.904595	turquoise
TEA000742	0.916706	turquoise
TEA006108	0.818071	turquoise
TEA033678	0.949517	turquoise
TEA015239	0.897767	turquoise
TEA000745	-0.958024	turquoise
TEA013411	0.962916	turquoise
TEA006621	0.958693	turquoise
TEA020945	0.926307	turquoise
TEA015230	0.758107	turquoise
TEA027562	0.875505	turquoise
TEA008619	0.896254	turquoise
TEA022132	-0.570827	turquoise
TEA015366	-0.902763	turquoise
TEA001479	-0.644711	turquoise
TEA029424	-0.856072	turquoise
TEA027394	-0.904548	turquoise
TEA023642	0.96454	turquoise
TEA004821	0.966426	turquoise
TEA019528	0.964932	turquoise
TEA012045	-0.876631	turquoise
TEA016267	0.966774	turquoise
TEA006157	-0.830494	turquoise
TEA029089	0.951567	turquoise
TEA015316	0.954309	turquoise
TEA017369	0.849125	turquoise
TEA028644	0.940447	turquoise
TEA023912	0.690941	turquoise
TEA006566	0.959528	turquoise
TEA002530	0.950833	turquoise
TEA013788	0.936991	turquoise
TEA014338	0.938192	turquoise
TEA015240	0.986935	turquoise
TEA023680	0.997822	turquoise
TEA001682	0.917294	turquoise
TEA031780	0.915925	turquoise
TEA018051	0.974552	turquoise
TEA003686	0.866584	turquoise
TEA031868	-0.901395	turquoise
TEA022027	-0.752009	turquoise
TEA030472	-0.965632	turquoise
TEA006368	0.925937	turquoise
TEA016217	-0.93488	turquoise
TEA004626	0.950459	turquoise
TEA002400	-0.833243	turquoise
TEA015383	0.801781	turquoise
TEA015513	-0.92395	turquoise
TEA014537	0.895684	turquoise
TEA019161	0.836128	turquoise
TEA023985	-0.84053	turquoise
TEA033716	0.878898	turquoise
TEA032946	0.959074	turquoise
TEA029477	0.906849	turquoise
TEA019443	-0.827159	turquoise
TEA012091	-0.875614	turquoise
TEA027524	0.771888	turquoise
TEA014110	-0.919971	turquoise
TEA030508	0.910894	turquoise
TEA029630	-0.707779	turquoise
TEA016574	0.946819	turquoise
TEA023160	0.985182	turquoise
TEA027658	0.386949	turquoise
TEA008468	-0.896035	turquoise
TEA023770	0.885437	turquoise
TEA015298	-0.896462	turquoise
TEA030961	0.71597	turquoise
TEA033321	0.97061	turquoise
TEA030269	0.851011	turquoise
TEA033030	0.917314	turquoise
TEA027636	0.882285	turquoise
TEA001838	0.873311	turquoise
TEA005416	-0.831853	turquoise
TEA004414	-0.887001	turquoise
TEA012328	0.686417	turquoise
TEA031244	0.933264	turquoise
TEA033164	0.872776	turquoise
TEA026212	0.901514	turquoise
TEA020766	-0.881295	turquoise
TEA027146	0.812202	turquoise
TEA020396	-0.764376	turquoise
TEA011282	0.893751	turquoise
TEA006124	-0.775353	turquoise
TEA012552	-0.866494	turquoise
TEA012257	0.912558	turquoise
TEA011299	-0.596156	turquoise
TEA030010	-0.84548	turquoise
TEA022098	0.841779	turquoise
TEA004179	-0.944613	turquoise
TEA019711	-0.745494	turquoise
TEA019965	0.647376	turquoise
TEA016026	0.919121	turquoise
TEA031909	-0.735351	turquoise
TEA029761	-0.906615	turquoise
TEA001826	-0.785044	turquoise
TEA000190	0.912952	turquoise
TEA011824	0.903501	turquoise
TEA021451	0.82056	turquoise
TEA008919	0.854996	turquoise
TEA016091	0.697193	turquoise
TEA011193	0.541542	turquoise
TEA004254	0.669523	turquoise
TEA016358	0.632124	turquoise
TEA030092	-0.936902	turquoise
TEA015282	0.73832	turquoise
TEA023701	0.962328	turquoise
TEA006761	-0.804317	turquoise
TEA019813	0.982035	turquoise
TEA014952	-0.917855	turquoise
TEA019601	0.897437	turquoise
TEA013976	-0.833441	turquoise
TEA017398	0.880551	turquoise
TEA000812	-0.729683	turquoise
TEA013076	0.932299	turquoise
TEA001092	0.846989	turquoise
TEA010597	0.982931	turquoise
TEA033457	0.982176	turquoise
TEA011425	0.919078	turquoise
TEA027163	0.942169	turquoise
TEA011812	0.924045	turquoise
TEA027728	0.854319	turquoise
TEA017444	0.875264	turquoise
TEA011744	-0.299096	turquoise
TEA005385	0.741668	turquoise
TEA030580	0.914527	turquoise
TEA001465	0.893197	turquoise
TEA032034	0.6964	turquoise
TEA004450	0.921783	turquoise
TEA000538	0.799913	turquoise
TEA018294	0.895553	turquoise
TEA019917	0.923246	turquoise
TEA017761	-0.757239	turquoise
TEA031291	0.951704	turquoise
TEA016185	0.844178	turquoise
TEA026390	0.74682	turquoise
TEA025482	0.915865	turquoise
TEA008566	0.962324	turquoise
TEA012169	0.908775	turquoise
TEA013401	0.983909	turquoise
TEA007362	-0.771028	turquoise
TEA023885	-0.709149	turquoise
TEA021964	-0.922523	turquoise
TEA004780	0.774938	turquoise
TEA008688	-0.681322	turquoise
TEA016762	-0.894539	turquoise
TEA006501	-0.758622	turquoise
TEA032700	0.982616	turquoise
TEA025041	0.856317	turquoise
TEA012989	0.850144	turquoise
TEA032155	0.971124	turquoise
TEA027357	-0.913488	turquoise
TEA017785	-0.938538	turquoise
TEA019901	0.371619	turquoise
TEA007099	0.967048	turquoise
TEA005992	-0.63637	turquoise
TEA031376	-0.806904	turquoise
TEA015646	0.8903	turquoise
TEA025802	0.938924	turquoise
TEA018814	-0.944889	turquoise
TEA020786	0.968868	turquoise
TEA023685	0.933626	turquoise
TEA017372	0.796267	turquoise
TEA006377	-0.657021	turquoise
TEA006352	-0.658921	turquoise
TEA009128	0.807455	turquoise
TEA011122	0.671479	turquoise
TEA019087	0.907579	turquoise
TEA023522	0.927776	turquoise
TEA004066	-0.945742	turquoise
TEA019883	0.911472	turquoise
TEA001959	0.984594	turquoise
TEA022099	0.870302	turquoise
TEA020768	0.603091	turquoise
TEA010874	-0.891679	turquoise
TEA020513	0.877056	turquoise
TEA004463	0.988723	turquoise
TEA015685	0.304113	turquoise
TEA024523	0.945412	turquoise
TEA016835	0.690987	turquoise
TEA015531	-0.875853	turquoise
TEA009393	0.963519	turquoise
TEA004053	0.646802	turquoise
TEA003687	-0.772752	turquoise
TEA020024	0.939285	turquoise
TEA027601	-0.952004	turquoise
TEA028643	0.849441	turquoise
TEA011691	0.92535	turquoise
TEA006732	0.84383	turquoise
TEA012758	0.963375	turquoise
TEA024532	0.784255	turquoise
TEA018491	0.991762	turquoise
TEA000992	0.95236	turquoise
TEA003533	0.863139	turquoise
TEA006207	0.971181	turquoise
TEA027522	0.969109	turquoise
TEA005607	0.842722	turquoise
TEA015198	0.869275	turquoise
TEA031069	-0.790743	turquoise
TEA021273	0.64534	turquoise
TEA013613	0.950885	turquoise
TEA004484	-0.879061	turquoise
TEA012063	-0.94474	turquoise
TEA003457	-0.929559	turquoise
TEA005066	0.825812	turquoise
TEA014857	0.986929	turquoise
TEA003586	0.932209	turquoise
TEA015717	0.813717	turquoise
TEA008720	0.983639	turquoise
TEA002354	-0.65762	turquoise
TEA018935	-0.382701	turquoise
TEA028662	0.962341	turquoise
TEA024842	-0.889353	turquoise
TEA014562	0.958383	turquoise
TEA001716	0.859935	turquoise
TEA033455	0.812532	turquoise
TEA026381	0.887493	turquoise
TEA031124	0.935139	turquoise
TEA022811	0.9712	turquoise
TEA030808	0.552076	turquoise
TEA015233	0.995276	turquoise
TEA023006	0.853441	turquoise
TEA027393	-0.572646	turquoise
TEA013644	0.695811	turquoise
TEA032979	-0.879157	turquoise
TEA010691	-0.87956	turquoise
TEA007262	0.899539	turquoise
TEA025927	0.984448	turquoise
TEA002508	0.973993	turquoise
TEA016395	-0.809676	turquoise
TEA000016	0.904151	turquoise
TEA031855	0.598737	turquoise
TEA011346	-0.745059	turquoise
TEA000089	0.637545	turquoise
TEA015723	0.931288	turquoise
TEA007517	0.914247	turquoise
TEA020977	0.888178	turquoise
TEA021566	-0.402468	turquoise
TEA019061	0.736992	turquoise
TEA031346	-0.934281	turquoise
TEA003078	0.727963	turquoise
TEA031786	0.8137	turquoise
TEA022723	0.844311	turquoise
TEA031996	-0.686316	turquoise
TEA012299	0.946128	turquoise
TEA028833	-0.862986	turquoise
TEA026580	-0.93197	turquoise
TEA019705	0.538416	turquoise
TEA004934	-0.910672	turquoise
TEA012804	0.908619	turquoise
TEA032617	0.798081	turquoise
TEA030635	0.746308	turquoise
TEA020908	-0.896794	turquoise
TEA003550	-0.853226	turquoise
TEA018775	0.755944	turquoise
TEA002149	0.958292	turquoise
TEA000389	-0.797466	turquoise
TEA028983	0.975154	turquoise
TEA005298	-0.490043	turquoise
TEA011400	0.956395	turquoise
TEA006519	0.878905	turquoise
TEA004238	0.995565	turquoise
TEA023727	-0.84426	turquoise
TEA030992	-0.938627	turquoise
TEA014572	-0.9254	turquoise
TEA027824	-0.848707	turquoise
TEA002103	-0.650209	turquoise
TEA031419	0.982911	turquoise
TEA005919	-0.828304	turquoise
TEA012470	0.961448	turquoise
TEA000186	0.798909	turquoise
TEA001248	-0.63012	turquoise
TEA002610	-0.939562	turquoise
TEA031727	0.934519	turquoise
TEA005898	0.822292	turquoise
TEA026485	-0.781835	turquoise
TEA024086	0.94114	turquoise
TEA033673	-0.596828	turquoise
TEA017298	0.590408	turquoise
TEA006569	0.825898	turquoise
TEA012890	-0.805911	turquoise
TEA029048	-0.530593	turquoise
TEA007773	-0.937426	turquoise
TEA032211	-0.972139	turquoise
TEA014168	-0.927228	turquoise
TEA009382	-0.780059	turquoise
TEA025009	0.817958	turquoise
TEA008352	-0.943493	turquoise
TEA025743	0.362308	turquoise
TEA008160	0.612087	turquoise
TEA011704	-0.661582	turquoise
TEA029343	0.909151	turquoise
TEA008577	-0.875712	turquoise
TEA018276	-0.415367	turquoise
TEA015454	0.885461	turquoise
TEA022710	0.950312	turquoise
TEA007683	0.943226	turquoise
TEA021235	-0.591528	turquoise
TEA029501	-0.753083	turquoise
TEA003384	0.73822	turquoise
TEA013898	0.847104	turquoise
TEA009754	-0.906619	turquoise
TEA027424	-0.871979	turquoise
TEA007066	-0.905556	turquoise
TEA015295	0.808033	turquoise
TEA017566	0.977318	turquoise
TEA003342	0.725726	red
TEA017001	-0.751985	red
TEA010319	0.925437	red
TEA010679	0.892407	red
TEA005788	0.876787	red
TEA001864	0.938858	red
TEA013870	-0.711398	red
TEA028071	-0.884625	red
TEA005837	0.649097	red
TEA004742	-0.697694	red
TEA017061	0.863874	red
TEA033846	-0.81967	red
TEA014382	0.905624	red
TEA011907	-0.600048	red
TEA011029	0.785444	red
TEA001113	-0.809838	red
TEA024141	0.88833	red
TEA003443	0.784771	red
TEA031772	0.836622	red
TEA003048	0.615596	red
TEA008133	-0.746221	red
TEA017391	0.879322	red
TEA020962	-0.723175	red
TEA014256	0.913248	red
TEA008802	0.94303	red
TEA032713	0.877009	red
TEA016260	0.891261	red
TEA014452	0.766784	red
TEA006357	-0.802934	red
TEA016782	0.390898	red
TEA027197	-0.543313	red
TEA001386	0.92588	red
TEA000106	0.820723	red
TEA006769	-0.523711	red
TEA023332	0.936264	red
TEA008710	0.867895	red
TEA025311	-0.706066	red
TEA009528	0.81539	red
TEA002001	-0.265456	red
TEA018819	-0.786018	red
TEA033516	-0.677769	red
TEA017241	-0.441371	red
TEA011772	0.778194	red
TEA013544	0.940379	red
TEA029995	-0.61655	red
TEA031006	0.803422	red
TEA023688	0.8376	red
TEA016740	-0.900083	red
TEA030028	0.87137	red
TEA006528	0.595921	red
TEA027799	-0.895535	red
TEA000437	-0.557144	red
TEA013105	-0.757112	red
TEA025817	0.845624	red
TEA004981	-0.72499	red
TEA030678	0.795047	red
TEA021982	0.625787	red
TEA003778	-0.637239	red
TEA017918	0.631725	red
TEA002650	0.913273	red
TEA011582	0.872045	red
TEA011802	0.431488	red
TEA019438	-0.714568	red
TEA028274	-0.816096	red
TEA029163	-0.828005	red
TEA010314	0.724894	red
TEA017360	-0.770737	red
TEA017315	0.742936	red
TEA026213	-0.718277	red
TEA007676	-0.6733	red
TEA022103	0.751781	red
TEA013378	0.705257	red
TEA007756	0.922812	red
TEA030714	-0.844628	red
TEA005599	-0.853799	red
TEA032565	-0.385355	red
TEA020350	0.790671	red
TEA023738	-0.580505	red
TEA013705	0.90649	red
TEA017442	-0.792546	red
TEA021776	0.915698	red
TEA006068	0.809666	red
TEA004931	-0.786566	red
TEA023209	-0.847688	red
TEA022118	-0.937612	red
TEA016775	-0.928053	red
TEA020559	-0.814228	red
TEA000811	0.866997	red
TEA017695	-0.898135	red
TEA017080	0.720623	red
TEA026395	-0.645793	red
TEA003142	0.695949	red
TEA015616	-0.387747	red
TEA029091	-0.587539	red
TEA025586	0.892713	red
TEA003280	-0.239094	red
TEA031895	0.701122	red
TEA015297	-0.960604	red
TEA027117	-0.614842	red
TEA014223	0.852383	red
TEA003800	0.882001	red
TEA032826	-0.73297	red
TEA003223	0.927908	red
TEA010879	0.843753	red
TEA002585	-0.690516	red
TEA012682	-0.789677	red
TEA000842	-0.865006	red
TEA013964	0.596549	red
TEA003744	0.762484	red
TEA001017	0.819007	red
TEA026765	0.760852	red
TEA033025	0.379201	red
TEA028073	-0.647267	red
TEA029194	-0.770369	red
TEA002242	0.623216	red
TEA014173	0.879141	red
TEA028255	0.874111	red
TEA023162	-0.845989	red
TEA013177	0.864569	red
TEA001644	0.829394	red
TEA027826	-0.726778	red
TEA030746	0.862312	red
TEA003167	-0.784799	red
TEA031378	-0.420933	red
TEA009720	0.807546	red
TEA014697	0.971097	red
TEA001673	-0.865334	red
TEA018077	0.846238	red
TEA003791	0.862611	red
TEA002668	-0.87718	red
TEA029486	0.881288	red
TEA002712	-0.808231	red
TEA014234	-0.757363	red
TEA013783	-0.71689	red
TEA000933	0.887456	red
TEA028494	-0.630848	red
TEA022394	-0.901836	red
TEA005341	0.572548	red
TEA021918	-0.887398	red
TEA026302	-0.666979	red
TEA024823	-0.851306	red
TEA029965	-0.817034	red
TEA024014	-0.878603	red
TEA030658	-0.38627	red
TEA013216	0.848144	red
TEA004609	0.830362	red
TEA006404	-0.895254	red
TEA031816	-0.704302	red
TEA005211	-0.864992	red
TEA011995	0.873112	red
TEA011159	0.356331	red
TEA005488	0.844332	red
TEA023055	0.707885	red
TEA003041	0.592712	red
TEA016186	-0.694667	red
TEA026711	-0.850671	red
TEA033033	-0.610888	red
TEA019749	0.819673	red
TEA002308	0.827706	red
TEA031799	-0.44285	red
TEA002502	-0.625914	red
TEA027031	0.927162	red
TEA021949	-0.651809	red
TEA005195	0.949557	red
TEA015890	0.932167	red
TEA026323	0.961561	red
TEA022238	-0.468657	red
TEA005434	0.952658	red
TEA002368	-0.745601	red
TEA029557	0.8736	red
TEA016599	0.865167	red
TEA005051	0.65211	red
TEA004429	0.731398	red
TEA002469	0.866409	red
TEA000058	-0.846078	red
TEA013536	-0.483246	red
TEA008184	0.891361	red
TEA019998	0.600142	red
TEA023572	-0.708016	red
TEA011245	0.798415	red
TEA006801	-0.527989	red
TEA007016	0.717944	red
TEA019586	-0.715521	red
TEA009656	0.861837	red
TEA007823	-0.673565	red
TEA033441	-0.874469	red
TEA004696	0.86168	greenyellow
TEA025159	0.665332	greenyellow
TEA029659	0.891242	greenyellow
TEA017457	0.880419	greenyellow
TEA006417	0.840498	greenyellow
TEA008267	-0.940614	greenyellow
TEA018793	0.936315	greenyellow
TEA026680	0.909809	greenyellow
TEA030231	-0.928707	greenyellow
TEA024960	0.959308	greenyellow
TEA029380	-0.921733	greenyellow
TEA016198	0.715069	greenyellow
TEA032272	-0.870458	greenyellow
TEA016093	0.864503	greenyellow
TEA002799	0.926367	greenyellow
TEA002980	0.915501	greenyellow
TEA015549	0.934563	greenyellow
TEA029344	0.886895	greenyellow
TEA024406	-0.810667	greenyellow
TEA016295	0.861566	greenyellow
TEA012496	0.837103	greenyellow
TEA028379	-0.882348	greenyellow
TEA004216	0.861005	greenyellow
TEA011984	-0.863466	greenyellow
TEA007695	0.895701	greenyellow
TEA028410	-0.841476	greenyellow
TEA012894	0.933118	greenyellow
TEA022883	0.720125	greenyellow
TEA005509	-0.969005	greenyellow
TEA016696	0.879192	greenyellow
TEA026320	0.941225	greenyellow
TEA008639	-0.893735	greenyellow
TEA000490	0.852354	greenyellow
TEA011447	-0.903879	greenyellow
TEA008105	-0.801084	greenyellow
TEA005699	0.864472	greenyellow
TEA009951	0.9055	greenyellow
TEA008408	0.878901	greenyellow
TEA024072	0.826374	greenyellow
TEA023488	-0.908563	greenyellow
TEA025103	-0.860644	greenyellow
TEA008738	0.671072	greenyellow
TEA026440	-0.732189	greenyellow
TEA014647	-0.924575	greenyellow
TEA017145	-0.930189	greenyellow
TEA027829	-0.626586	greenyellow
TEA030646	0.933275	greenyellow
TEA018976	0.719915	greenyellow
TEA026341	0.903171	greenyellow
TEA006123	0.700442	greenyellow
TEA024500	-0.8154	greenyellow
TEA018297	0.931055	greenyellow
TEA009818	-0.830079	greenyellow
TEA018905	0.854974	greenyellow
TEA003339	-0.915786	greenyellow
TEA003279	0.922272	greenyellow
TEA024415	-0.879232	greenyellow
TEA001570	0.868594	greenyellow
TEA021181	-0.790365	greenyellow
TEA000801	-0.840903	greenyellow
TEA028536	-0.839689	greenyellow
TEA004777	-0.622834	greenyellow
TEA018340	0.900201	greenyellow
TEA009539	0.90924	greenyellow
TEA026843	0.896028	greenyellow
TEA009342	0.90729	greenyellow
TEA013314	-0.808406	greenyellow
TEA024666	-0.721872	greenyellow
TEA027111	-0.908247	greenyellow
TEA016367	0.840367	greenyellow
TEA022860	0.925473	greenyellow
TEA029538	0.723325	greenyellow
TEA009835	0.707996	greenyellow
TEA028712	0.742654	greenyellow
TEA013212	0.765311	greenyellow
TEA022674	0.900353	greenyellow
TEA012722	-0.969596	greenyellow
TEA006982	0.929461	greenyellow
TEA027798	0.671036	greenyellow
TEA026698	0.799247	greenyellow
TEA003607	0.872006	greenyellow
TEA005513	0.815015	greenyellow
TEA032006	0.89728	greenyellow
TEA024725	-0.96666	greenyellow
TEA023378	-0.795884	greenyellow
TEA023302	-0.849525	greenyellow
TEA000850	-0.913035	greenyellow
TEA020331	-0.49248	greenyellow
TEA015680	0.836924	greenyellow
TEA033060	0.945893	greenyellow
TEA017607	-0.904368	greenyellow
TEA028951	0.930402	greenyellow
TEA016049	0.828446	pink
TEA009793	0.852779	pink
TEA028282	0.908262	pink
TEA030090	-0.90852	pink
TEA014809	0.890866	pink
TEA025665	-0.86149	pink
TEA021528	0.98598	pink
TEA020109	0.692775	pink
TEA005315	-0.850083	pink
TEA009843	0.856679	pink
TEA000097	0.926079	pink
TEA033900	0.888815	pink
TEA007644	-0.878037	pink
TEA019984	0.399025	pink
TEA000572	0.863116	pink
TEA013193	0.795175	pink
TEA021795	-0.822888	pink
TEA023444	0.642506	pink
TEA017224	-0.853585	pink
TEA033724	0.910859	pink
TEA021655	0.852153	pink
TEA000846	0.883385	pink
TEA018201	0.839269	pink
TEA014371	0.74548	pink
TEA009032	0.894098	pink
TEA006597	0.84084	pink
TEA029823	0.922168	pink
TEA026540	-0.747735	pink
TEA001124	0.533769	pink
TEA018069	0.954231	pink
TEA008473	0.849515	pink
TEA019952	0.889011	pink
TEA009190	-0.815042	pink
TEA026798	0.790909	pink
TEA018071	0.787183	pink
TEA030184	0.867513	pink
TEA029441	0.897507	pink
TEA018776	0.885367	pink
TEA032710	0.909114	pink
TEA019533	0.779499	pink
TEA007296	0.782042	pink
TEA005668	0.862487	pink
TEA025411	0.896617	pink
TEA021074	-0.891556	pink
TEA018689	0.908051	pink
TEA007992	0.896134	pink
TEA006385	-0.824196	pink
TEA005083	-0.77904	pink
TEA021026	-0.766494	pink
TEA014761	0.727569	pink
TEA007606	0.736724	pink
TEA022423	-0.851464	pink
TEA023910	0.744244	pink
TEA030967	0.746174	pink
TEA032426	-0.678842	pink
TEA012805	0.884255	pink
TEA013372	-0.504948	pink
TEA001784	0.792711	pink
TEA016467	0.866132	pink
TEA001011	-0.862744	pink
TEA009820	0.930133	pink
TEA006546	0.833633	pink
TEA026352	-0.590162	pink
TEA015512	0.855313	pink
TEA023394	-0.788399	pink
TEA025546	-0.727094	pink
TEA026655	0.892619	pink
TEA012138	0.898181	pink
TEA024984	0.814666	pink
TEA025839	0.887472	pink
TEA006549	-0.892463	pink
TEA028641	0.873726	pink
TEA020603	0.903002	pink
TEA003092	0.782944	pink
TEA016585	0.721742	pink
TEA025363	0.75585	pink
TEA016728	0.801237	pink
TEA030530	0.814249	pink
TEA021916	0.84961	pink
TEA023352	-0.861791	pink
TEA027719	-0.779337	pink
TEA010820	0.856351	pink
TEA022678	0.91533	pink
TEA026066	0.756482	pink
TEA028949	0.786404	pink
TEA017416	-0.811424	pink
TEA001450	-0.750395	pink
TEA015005	0.903521	pink
TEA002515	0.577657	pink
TEA016157	-0.934829	pink
TEA025435	-0.736847	pink
TEA019554	-0.775794	pink
TEA021531	0.908713	pink
TEA021445	0.913777	pink
TEA030248	-0.884936	pink
TEA019806	0.954523	pink
TEA026475	-0.802922	pink
TEA019132	0.720724	pink
TEA028966	0.689694	pink
TEA012367	0.77969	pink
TEA022632	-0.728251	pink
TEA022577	-0.857492	pink
TEA005654	0.725876	pink
TEA003888	0.92062	pink
TEA017109	-0.644919	pink
TEA031751	-0.722486	pink
TEA006267	0.826586	pink
TEA034008	-0.885465	pink
TEA030556	-0.869276	pink
TEA024296	0.738943	pink
TEA009826	0.88777	pink
TEA009605	0.809321	pink
TEA033099	0.827323	pink
TEA030639	0.732464	pink
TEA016273	0.726361	pink
TEA000944	0.910402	pink
TEA014136	-0.680739	pink
TEA003990	-0.806234	pink
TEA027768	0.888688	pink
TEA026582	-0.896069	pink
TEA004818	0.87517	pink
TEA009313	0.92188	pink
TEA011170	0.847511	pink
TEA019839	-0.706429	pink
TEA003350	-0.946803	pink
TEA023447	0.646029	pink
TEA025602	0.903369	pink
TEA010581	-0.57482	pink
TEA014582	-0.724687	pink
TEA033788	0.782846	pink
TEA003814	-0.792826	pink
TEA006048	-0.936155	pink
TEA009212	-0.93863	pink
TEA000288	0.880414	pink
TEA012718	-0.842824	pink
TEA017066	-0.752063	pink
TEA016507	0.847342	pink
TEA016751	-0.765204	pink
TEA016257	-0.78561	pink
TEA007105	-0.967374	pink
TEA008453	0.712895	pink
TEA017271	0.910657	pink
TEA004421	0.583439	pink
TEA019489	-0.892415	pink
TEA026487	-0.909399	pink
TEA009340	0.768691	pink
TEA014808	0.912836	pink
TEA010575	-0.928041	pink
TEA003211	0.90857	pink
TEA032725	0.973546	magenta
TEA014412	0.87495	magenta
TEA030284	0.652747	magenta
TEA010147	0.901287	magenta
TEA023790	-0.963228	magenta
TEA023340	-0.877895	magenta
TEA023432	0.81076	magenta
TEA022196	0.934188	magenta
TEA034042	-0.862044	magenta
TEA023333	-0.856281	magenta
TEA022693	-0.824436	magenta
TEA019397	0.846019	magenta
TEA000238	0.846674	magenta
TEA028234	0.907419	magenta
TEA018733	-0.831157	magenta
TEA008186	0.93463	magenta
TEA030995	-0.708268	magenta
TEA018892	0.755977	magenta
TEA009345	0.929156	magenta
TEA014864	-0.922464	magenta
TEA006927	0.954371	magenta
TEA000817	0.919239	magenta
TEA011301	-0.620622	magenta
TEA023507	0.950341	magenta
TEA003973	0.860545	magenta
TEA018894	0.943119	magenta
TEA033745	0.963533	magenta
TEA006156	0.920019	magenta
TEA014456	-0.794135	magenta
TEA002513	0.907255	magenta
TEA013395	0.942284	magenta
TEA027876	0.826548	magenta
TEA009887	-0.896574	magenta
TEA008502	0.955796	magenta
TEA004665	-0.851282	magenta
TEA015181	0.967967	magenta
TEA004181	-0.769709	magenta
TEA006256	0.729785	magenta
TEA026599	-0.569404	magenta
TEA008516	0.893614	magenta
TEA012229	0.793907	magenta
TEA031811	-0.866954	magenta
TEA004541	0.950629	magenta
TEA008356	0.865115	magenta
TEA032349	0.725139	magenta
TEA013240	0.929308	magenta
TEA005981	0.841384	magenta
TEA031956	0.936171	magenta
TEA028166	-0.732376	magenta
TEA012314	0.868052	magenta
TEA026805	0.782037	magenta
TEA024262	-0.914739	magenta
TEA018271	-0.889255	magenta
TEA022029	-0.788016	magenta
TEA009805	0.918963	magenta
TEA028279	0.866136	magenta
TEA027975	0.783449	magenta
TEA012255	0.816702	magenta
TEA033842	0.957264	magenta
TEA000909	-0.907423	magenta
TEA024717	0.923464	magenta
TEA027027	-0.501198	magenta
TEA013801	-0.89161	magenta
TEA030657	0.672703	magenta
TEA005276	0.782828	magenta
TEA004327	0.806256	magenta
TEA033529	0.328228	magenta
TEA033635	0.770446	magenta
TEA015511	0.961621	magenta
TEA001110	0.964524	magenta
TEA017743	0.897303	magenta
TEA026448	0.820113	magenta
TEA001153	0.804119	magenta
TEA025957	0.856255	magenta
TEA007244	0.844172	magenta
TEA017319	0.85531	magenta
TEA027929	0.898517	magenta
TEA013290	0.927466	magenta
TEA021411	-0.709324	magenta
TEA016159	0.806074	magenta
TEA014101	0.933643	magenta
TEA016102	0.744832	magenta
TEA019411	0.913556	magenta
TEA004851	-0.667297	magenta
TEA011020	0.788509	magenta
TEA011223	-0.663086	magenta
TEA014335	-0.932736	magenta
TEA027898	0.919914	magenta
TEA026568	0.908773	magenta
TEA007018	0.876812	magenta
TEA012232	0.923282	magenta
TEA019947	0.767114	magenta
TEA032879	-0.809863	magenta
TEA028143	0.801716	magenta
TEA030910	-0.810726	magenta
TEA016196	-0.940601	magenta
TEA024504	-0.775036	magenta
TEA030324	0.797139	magenta
TEA015135	0.960295	magenta
TEA028664	0.859167	magenta
TEA011779	0.97436	magenta
TEA020055	0.938737	magenta
TEA018325	-0.696297	magenta
TEA010264	-0.88511	magenta
TEA025063	-0.817396	magenta
TEA001052	-0.868693	magenta
TEA032245	0.716105	magenta
[truncated: 1,175 more rows]
